# Supplementary material for: Advance consent for participation in randomised controlled trials for emergency conditions: a scoping review
Source: PubMed Central journal article supplement — BMJ Open. 2023 Feb 7;13(2):e066742. doi: 10.1136/bmjopen-2022-066742 (PMC9906254; doi:10.1136/bmjopen-2022-066742), 2023-02-07

# BMJ Open

BMJ Open is committed to open peer review. As part of this commitment we make the peer review history of every article we publish publicly available.

When an article is published we post the peer reviewers' comments and the authors' responses online. We also post the versions of the paper that were used during peer review. These are the versions that the peer review comments apply to.

The versions of the paper that follow are the versions that were submitted during the peer review process. They are not the versions of record or the final published versions. They should not be cited or distributed as the published version of this manuscript.

BMJ Open is an open access journal and the full, final, typeset and author-corrected version of record of the manuscript is available on our site with no access controls, subscription charges or pay-per-view fees (<http://bmjopen.bmj.com>).

If you have any questions on BMJ Open's open peer review process please email [info.bmjopen@bmj.com](mailto:info.bmjopen@bmj.com)

# BMJ Open

## ADVANCE CONSENT FOR PARTICIPATION IN RANDOMIZED CONTROLLED TRIALS FOR EMERGENCY CONDITIONS: A SCOPING REVIEW

|                               |                                                                                                                                                                                                                                                                                                                                                                                                                                                                                                                                                                                                            |
|-------------------------------|------------------------------------------------------------------------------------------------------------------------------------------------------------------------------------------------------------------------------------------------------------------------------------------------------------------------------------------------------------------------------------------------------------------------------------------------------------------------------------------------------------------------------------------------------------------------------------------------------------|
| Journal:                      | <i>BMJ Open</i>                                                                                                                                                                                                                                                                                                                                                                                                                                                                                                                                                                                            |
| Manuscript ID                 | bmjopen-2022-066742                                                                                                                                                                                                                                                                                                                                                                                                                                                                                                                                                                                        |
| Article Type:                 | Original research                                                                                                                                                                                                                                                                                                                                                                                                                                                                                                                                                                                          |
| Date Submitted by the Author: | 18-Jul-2022                                                                                                                                                                                                                                                                                                                                                                                                                                                                                                                                                                                                |
| Complete List of Authors:     | Niznick, Naomi; Ottawa Hospital, Division of Neurology, Department of Medicine<br>Lun, Ronda; Ottawa Hospital, Division of Neurology, Department of Medicine<br>Dewar, Brian; Ottawa Hospital Research Institute; Ottawa Hospital Research Institute<br>Perry, Jeffrey; Ottawa Hospital, Department of Emergency Medicine; Ottawa Hospital Research Institute<br>Dowlatshahi, Dar; Ottawa Hospital, Division of Neurology, Department of Medicine; Ottawa Hospital Research Institute<br>Shamy, Michel; Ottawa Hospital Research Institute; Ottawa Hospital, Division of Neurology, Department of Medicine |
| Keywords:                     | MEDICAL ETHICS, ACCIDENT & EMERGENCY MEDICINE, NEUROLOGY                                                                                                                                                                                                                                                                                                                                                                                                                                                                                                                                                   |
|                               |                                                                                                                                                                                                                                                                                                                                                                                                                                                                                                                                                                                                            |

SCHOLARONE™  
Manuscripts

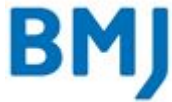

I, the Submitting Author has the right to grant and does grant on behalf of all authors of the Work (as defined in the below author licence), an exclusive licence and/or a non-exclusive licence for contributions from authors who are: i) UK Crown employees; ii) where BMJ has agreed a CC-BY licence shall apply, and/or iii) in accordance with the terms applicable for US Federal Government officers or employees acting as part of their official duties; on a worldwide, perpetual, irrevocable, royalty-free basis to BMJ Publishing Group Ltd ("BMJ") its licensees and where the relevant Journal is co-owned by BMJ to the co-owners of the Journal, to publish the Work in this journal and any other BMJ products and to exploit all rights, as set out in our [licence](#).

The Submitting Author accepts and understands that any supply made under these terms is made by BMJ to the Submitting Author unless you are acting as an employee on behalf of your employer or a postgraduate student of an affiliated institution which is paying any applicable article publishing charge ("APC") for Open Access articles. Where the Submitting Author wishes to make the Work available on an Open Access basis (and intends to pay the relevant APC), the terms of reuse of such Open Access shall be governed by a Creative Commons licence – details of these licences and which [Creative Commons](#) licence will apply to this Work are set out in our licence referred to above.

Other than as permitted in any relevant BMJ Author's Self Archiving Policies, I confirm this Work has not been accepted for publication elsewhere, is not being considered for publication elsewhere and does not duplicate material already published. I confirm all authors consent to publication of this Work and authorise the granting of this licence.

1  
2  
3 **ADVANCE CONSENT FOR PARTICIPATION IN RANDOMIZED CONTROLLED**  
4 **TRIALS FOR EMERGENCY CONDITIONS: A SCOPING REVIEW**  
5  
6  
7

8 **Authors:** Naomi Niznick MD<sup>1</sup>; Ronda Lun MD<sup>1</sup>; Brian Dewar MLIS<sup>2</sup>; Jeffrey J. Perry MD  
9 MSc<sup>2,3</sup>; Dar Dowlatshahi MD PhD<sup>1,2</sup>; Michel C. F. Shamy MD MA<sup>1,2</sup>  
10  
11

12  
13 <sup>1</sup> Division of Neurology, Department of Medicine, The Ottawa Hospital, Ottawa, Canada

14 <sup>2</sup> Ottawa Hospital Research Institute, The Ottawa Hospital, Ottawa, Canada

15 <sup>3</sup> Department of Emergency Medicine, The Ottawa Hospital, Ottawa, Canada  
16  
17  
18  
19  
20  
21  
22  
23

24 **Word count:** 2,505

25 **Figures:** 1

26 **Tables:** 3  
27  
28  
29  
30  
31  
32  
33  
34  
35  
36  
37

38 **Corresponding author:**

39 Naomi Niznick, MD.

40 Division of Neurology – The Ottawa Hospital

41 The Ottawa Hospital Civic Campus, 1053 Carling Avenue, Ottawa, ON, Canada, K1Y 4E9

42 naniznick@toh.ca  
43  
44

45 Phone: (613) 761-4777 // Fax: 613-761-5403  
46  
47  
48  
49  
50  
51  
52  
53  
54

55 **Keywords:** Consent; advance directives; research ethics; emergencies; scoping review.  
56  
57  
58  
59  
60

## ABSTRACT

**Objectives:** Advance consent is a recognized method of obtaining informed consent for participation in research, whereby a potential participant provides consent for future involvement in a study contingent on qualifying for the study's inclusion criteria on a later date. The goal of this study is to map the existing literature on the use of advance consent for enrollment in randomized control trials (RCTs) for emergency conditions.

**Design:** Scoping review designed in accordance with the PRISMA-Extension for Scoping Reviews guidelines.

**Data Sources:** We searched electronic databases including MEDLINE, EMBASE, Web of Science and the Cochrane Register of Clinical Trials from inception to February 10, 2020.

**Eligibility Criteria:** Eligible studies included articles that discussed or employed the use of advance consent for enrolment in RCTs related to emergency conditions. There were no restrictions on the type of eligible study. Data was extracted directly from included papers using a standardized data charting form. We produced a narrative review including article type and authors' dispositions towards advance consent.

**Results:** Our search yielded 1,039 titles with duplicates removed. Six articles met inclusion criteria. Three articles discussed the theoretical use of research advance directives in emergency conditions, one article evaluated stakeholders' perceptions of advance consent and one article described a method for patients to document their preferences for participation in future research. Only one study employed advance consent to enroll participants into a clinical trial for an emergency condition.

**Conclusion:** Our review demonstrates that there has been minimal exploration of advance consent for enrollment in RCTs for emergency conditions. Future studies could aim to assess the acceptability of advance consent to participants, along with the feasibility of enrolling research participants using this method of consent.

**Protocol:** The protocol for this scoping review was published a priori.<sup>1</sup>

## STRENGTHS & LIMITATIONS

- This scoping review outlines a novel approach to obtaining consent for enrollment in randomized control trials.

- We systemically summarized the literature using broad inclusion criteria which did not restrict the type of publications included in this scoping review.
- This review is limited by there being little literature available on this topic.
- Given the heterogeneity of study types included in our analysis, there is inherent risk of bias.

For peer review only

## INTRODUCTION

Informed consent, in which a patient agrees to participate in research after having received a thorough explanation of the potential risks and benefits, is a fundamental component of modern clinical research. Emergency research presents unique challenges to obtaining informed consent because decision-making needs to happen quickly, patients may be incapacitated, and patients and their family members may be severely distressed.<sup>2-4</sup> These challenges have been increasingly recognized in the design of trials for emergency neurological conditions such as acute ischemic stroke and intracerebral hemorrhage, where patients are almost universally incapable of providing consent and enrollment decisions need to happen on a scale of minutes.<sup>5, 6</sup> Several methods have been employed to try to address the challenge of informed consent in research with incapacitated patients under emergency circumstances. In some instances, patients may be enrolled into randomized controlled trials (RCTs) with consent from a substitute decision maker (SDM).<sup>7</sup> Other potential methods of enrollment include waiver of consent and deferral of consent, where a patient is enrolled into a study immediately and efforts are made to obtain consent after the fact – either from the patient or from an SDM.<sup>8-10</sup> Availability and acceptability of approaches to consent may vary depending on legal or cultural factors.<sup>7, 11, 12</sup>

Advance consent for enrollment in RCTs for emergency conditions is a potential method to overcome the challenges of obtaining informed consent. Advance consent for research occurs when a potential participant provides consent for future involvement in a study, contingent on qualifying for the study's inclusion criteria at a later date, for example when the participant no longer has capacity.<sup>13, 14</sup> Advance consent may be specific to a particular trial, may detail a patient's wishes concerning participation in specific types of studies, or may be a reflection of values to guide researchers about the patient's desire to participate in research. American and Canadian guidelines specifically allow for advanced consent; the Canadian TCPS2 statement explicitly requires researchers and authorized parties to "be guided by these directives".<sup>15</sup> Historically, advance consent has mainly been used for research in predictably progressive diseases, such as Alzheimer's dementia.<sup>16-19</sup> Though advance consent may appear challenging to apply to emergency conditions given their unpredictable nature, it may be possible to identify patients at risk of suffering from specific emergency conditions based on the presence of recognized risk factors. For example, patients seen in a cardiology clinic with coronary artery

1  
2  
3 disease who are at risk of developing acute coronary syndrome, patients seen in a stroke  
4 prevention clinic who are at risk of suffering an acute ischemic stroke or patients with epilepsy  
5 seen in a general neurology clinic who are at risk of presenting with status epilepticus. Inviting  
6 them to provide advance consent for research could alleviate many limitations of current consent  
7 practices for emergency research.  
8  
9  
10  
11  
12

13 With these issues in mind, we aimed to review the existing literature on the use of advance  
14 consent for enrollment in RCTs for emergency conditions, and to secondarily describe the use of  
15 advance consent specifically for emergency neurological conditions.  
16  
17  
18  
19

## 20 **METHODS AND ANALYSIS**

21 We conducted a scoping review to search the literature for experiences with advance consent for  
22 participation in RCTs for emergency conditions.<sup>1</sup> A detailed protocol of the study design and  
23 methods was developed, and published a priori.<sup>1</sup> This scoping review was designed in  
24 accordance with the PRISMA-Extension for Scoping Reviews guidelines.<sup>20</sup> It was conducted  
25 using the framework of Arksey and O'Malley, and further defined by Levac.<sup>21, 22</sup>  
26  
27  
28  
29  
30  
31

### 32 **Information sources and search strategy**

33 We performed a search of Medline, Embase (Embase Classic + Embase), Cochrane Central  
34 Register of Controlled Trials and Web of Science from inception to February 10, 2020. We  
35 developed a structured search strategy in consultation with a health science librarian. Controlled  
36 vocabulary and relevant key terms were used. Reference lists of included studies were reviewed  
37 for potential inclusion. The full search strategies are outlined in Supplementary Table 1.  
38  
39  
40  
41  
42  
43  
44  
45

### 46 **Eligibility criteria and study selection**

47 Research articles were selected for inclusion if they discussed, in any manner, the use of advance  
48 consent for participation in RCTs on emergency conditions and/or treatments. We included  
49 articles with adult patients 18 year or older, published in English. Articles were not restricted  
50 based on study design. Studies focusing on advance care planning in areas other than research, or  
51  
52  
53  
54  
55  
56  
57  
58  
59  
60



for research into non-emergency conditions, and those exclusively discussing other variations on informed consent, were excluded. Abstracts and letters to the editor were additionally excluded (Table 1).

**Table 1.** Inclusion and exclusion criteria

| Criteria                 | Inclusion                                                                                              | Exclusion                                                                                                                                                                                                    |
|--------------------------|--------------------------------------------------------------------------------------------------------|--------------------------------------------------------------------------------------------------------------------------------------------------------------------------------------------------------------|
| <b>Language</b>          | English                                                                                                | Any other language                                                                                                                                                                                           |
| <b>Type of article</b>   | RCTs, observational studies, systematic reviews, narrative reviews, surveys, interviews, ethics papers | Letters to the editor, abstracts                                                                                                                                                                             |
| <b>Age</b>               | 18 years or older                                                                                      | Younger than 18 years old                                                                                                                                                                                    |
| <b>Population</b>        | Emergency conditions and/or treatment                                                                  | (a) Non-emergency conditions, such as dementia, and non-emergent treatment<br>(b) Pregnancy                                                                                                                  |
| <b>Topic of interest</b> | Advance consent for participation in RCTs                                                              | (a) Other forms of consent such as deferred consent or waiver of consent<br>(b) Advance care planning in areas other than research such as medical care, treatment, and advance consent for end-of-life care |

We used Covidence (Covidence, Melbourne) to screen citations for inclusion at the title, abstract and full-text level.<sup>23</sup> Citations were screened independently by at least two trained reviewers (NN, RL). Reviewers met to resolve discrepancies after 25% of the title and abstract citations had been screened. Citations advanced to the next step of review after agreement between the two independent reviewers. Conflicts were resolved by consensus or a third-party independent reviewer (NN, RL). Reference lists of included full-text articles were reviewed for further relevant publications.

### Data extraction and charting

We retrieved the full texts of included studies, and the data were extracted by two independent reviewers (NN, RL) onto a standardized data charting form (Supplementary Table 2). Conflicts were resolved by consensus. Descriptive data were extracted on the article and author including the journal title, year of publication, type of author (MD, PhD, other), and publication country of

1  
2  
3 origin. Data on the paper characteristics, methodology, medical condition of interest, and method  
4 of employing advance consent for research was also obtained. Specifically, we extracted the type  
5 of research paper, the medical condition of focus, whether the medical condition was  
6 neurological, the author's position on the use of advance consent for research, and any  
7 statements explaining how advance consent was used or discussed in the paper. If the paper was  
8 a clinical study, we recorded whether advance consent was used to enroll participants.  
9  
10  
11  
12  
13  
14

## 15 **Analysis**

16  
17  
18 Given the anticipated heterogeneity of study methodology and expected varying use of advance  
19 consent in eligible studies, we performed a narrative review with descriptive analysis. Data were  
20 synthesized with thematic grouping. Quantitative analysis was not planned.  
21  
22  
23  
24

## 25 **Patient and public involvement**

26 Patients and the public were not directly involved in the design or dissemination plan of this  
27 research project.  
28  
29  
30  
31

## 32 **RESULTS**

### 33 **Search results**

34  
35  
36 Our electronic database searches yielded 1,532 studies. With duplicates removed, 1,039 titles and  
37 abstracts were screened, and 29 full-text articles were reviewed. No additional publications were  
38 including after reviewing the reference lists. Six articles met inclusion criteria (Figure 1).  
39  
40  
41  
42  
43  
44  
45

### 46 **Article characteristics**

47  
48  
49 The six articles were published from 1995 to 2019. All of the articles were from the United  
50 States. They were heterogeneous in their methodologies, medical conditions studied, and  
51 methods of using, evaluating or describing advance consent for research. Two of the articles  
52 were commentaries,<sup>24, 25</sup> one was a consensus statement,<sup>26</sup> one consisted of semi-structured  
53  
54  
55  
56  
57  
58  
59  
60

interviews,<sup>27</sup> one was a historical review,<sup>28</sup> and one was a cohort study.<sup>29</sup> Specific conditions addressed included acute psychiatric illnesses (n = 2),<sup>24, 29</sup> pneumonia (n = 1)<sup>27</sup> and stroke (n = 1).<sup>25</sup> Two articles did not mention specific conditions,<sup>26, 28</sup> but rather addressed emergency conditions in general. Three articles discussed the theoretical use of research advance directives in emergency conditions.<sup>24, 26, 28</sup> One article used semi-structured interviews to determine stakeholders' perceptions of the use of advance consent for enrollment in an RCT for the treatment of pneumonia.<sup>27</sup> One article described a method for patients to document their preferences for participation in future research as part of a broader approach to advance directive for stroke patients, but did not elaborate on advance consent specifically.<sup>25</sup> Only one study reported using advance consent to enroll participants into a clinical trial (Table 2).<sup>29</sup>

**Table 2.** Characteristics of included articles

| Author                  | Year | Country       | No.  | Type of article     | Condition                                               | Description of use of advance consent                                                                                                                                                                                                               |
|-------------------------|------|---------------|------|---------------------|---------------------------------------------------------|-----------------------------------------------------------------------------------------------------------------------------------------------------------------------------------------------------------------------------------------------------|
| <b>Backlar</b>          | 1999 | United States | 369  | Commentary          | Psychiatric - Schizophrenia                             | Author discusses the theoretical use of research advance directives                                                                                                                                                                                 |
| <b>Biros et al.</b>     | 1995 | United States | 303  | Consensus statement | No specific condition mentioned: "Emergency conditions" | Authors discuss the theoretical use of research advance directives in the context of federal regulations in the United States.                                                                                                                      |
| <b>Cole et al.</b>      | 2019 | United States | 1165 | Cohort              | Psychiatric - Agitation                                 | Authors employ the use advance consent for enrollment in an RCT. Observational cohort study of patients screened and consented in advance for potential future enrollment in a randomized trial examining treatments for acute agitation in the ED. |
| <b>Corneli et al.</b>   | 2018 | United States | 1095 | Interview           | Respiratory - Pneumonia                                 | Authors interview stakeholders to determine the perceived acceptability of the use advance consent for enrollment in a theoretical RCT.                                                                                                             |
| <b>Karlawish et al.</b> | 1997 | United States | 340  | Historical review   | No specific conditioned mentioned: "Emergency medicine" | Authors explain research advance directives and discuss the ethics and regulations in the United States concerning the use of advance consent for research on emergency conditions.                                                                 |

|                                                 |                                                                                                                                                                                                                                                                                                          |                    |      |               |     |            |                                    |                                                                                                                                                                                                                                     |
|-------------------------------------------------|----------------------------------------------------------------------------------------------------------------------------------------------------------------------------------------------------------------------------------------------------------------------------------------------------------|--------------------|------|---------------|-----|------------|------------------------------------|-------------------------------------------------------------------------------------------------------------------------------------------------------------------------------------------------------------------------------------|
| 1<br>2<br>3<br>4<br>5<br>6<br>7<br>8<br>9<br>10 | 11<br>12<br>13<br>14<br>15<br>16<br>17<br>18<br>19<br>20<br>21<br>22<br>23<br>24<br>25<br>26<br>27<br>28<br>29<br>30<br>31<br>32<br>33<br>34<br>35<br>36<br>37<br>38<br>39<br>40<br>41<br>42<br>43<br>44<br>45<br>46<br>47<br>48<br>49<br>50<br>51<br>52<br>53<br>54<br>55<br>56<br>57<br>58<br>59<br>60 | McGehrin<br>et al. | 2018 | United States | 811 | Commentary | Neurologic -<br>Ischemic<br>stroke | Authors outline the use of a standardized document which allows patients to record their preferences regarding acute stroke treatment interventions, as well as for preferences for participation in future stroke clinical trials. |
|-------------------------------------------------|----------------------------------------------------------------------------------------------------------------------------------------------------------------------------------------------------------------------------------------------------------------------------------------------------------|--------------------|------|---------------|-----|------------|------------------------------------|-------------------------------------------------------------------------------------------------------------------------------------------------------------------------------------------------------------------------------------|

### Arguments for and against the use of advance consent for research

Three articles expressed opinions in favour of using advance consent for research,<sup>24, 25, 27</sup> two were critical of its use,<sup>26, 29</sup> and one did not mention an opinion (Table 3).<sup>28</sup> The arguments in favour of advance consent were: that it is acceptable to patients (Corneli *et al.*) and that it enhances patient autonomy (Backlar, McGehrin *et al.*).<sup>24, 25, 27</sup> The arguments against advance consent were that it was not feasible (Cole *et al.*, Biros *et al.*), that participants would not be adequately informed (Biros *et al.*) and that it would not protect patients from the risks of participation in RCTs (Biros *et al.*).<sup>26, 29</sup> One article did not mention an opinion regarding the use of advance consent for research, and instead defined research advance directives, discussed the ethical considerations, and outlined the current regulations in the United States (Karlavish *et al.*).<sup>28</sup>

**Table 3.** Author's disposition on the use of advance consent for research

| Author       | Author's disposition                                    | Description of supporting evidence                                                                                                                                                                                                                                                                                                                                                                                                                                                                                                                    |
|--------------|---------------------------------------------------------|-------------------------------------------------------------------------------------------------------------------------------------------------------------------------------------------------------------------------------------------------------------------------------------------------------------------------------------------------------------------------------------------------------------------------------------------------------------------------------------------------------------------------------------------------------|
| Backlar      | <i>In favour</i> of use of advance consent for research | The author reasons that "substantive and procedural research advance directives allow potential subjects to make a choices of their own as to whether they wish to be enrolled and participate in a research protocol, to appoint a surrogate decision maker of their own choosing, and to additionally spell out specific safeguards"; and that "research advance directives provide potential subjects with the opportunity not only to make choices of their own but provide a mechanism that guarantees them a cluster of important protections." |
| Biros et al. | <i>Against</i> use of advance consent for research      | The authors contend that "patients may not consider consent carefully when the changes of entry into a specific study are remote. Thus, they may not be adequately protected from research risks".<br>Regarding advanced consent at hospital admission for a potential future research protocol, the authors argue that pre-consent "cannot be used for emergency research in the prehospital setting or for studying the treatment of acute illnesses that occur in the out-of-hospital setting".                                                    |

|                  |                                                                          |                                                                                                                                                                                                                                                                                                                                                                                                                                                                                                                                                                                                                                                                         |
|------------------|--------------------------------------------------------------------------|-------------------------------------------------------------------------------------------------------------------------------------------------------------------------------------------------------------------------------------------------------------------------------------------------------------------------------------------------------------------------------------------------------------------------------------------------------------------------------------------------------------------------------------------------------------------------------------------------------------------------------------------------------------------------|
|                  |                                                                          | Regarding obtaining advanced consent from unaffected subjects who may require emergency care in the future, the authors argue that “identifying those patients who have previously consented may not be feasible when the critical situation occurs”.                                                                                                                                                                                                                                                                                                                                                                                                                   |
| Cole et al.      | <i>Against</i> use of advance consent for research                       | The authors screened 1,461 patients for their RCT on loxapine versus IM haloperidol + lorazepam for treatment of acute agitation in the ED secondary to bipolar disorder type 1 or schizophrenia. “Despite screening >1,400 patients and obtaining preconsent in 43 patients”, not a single patient was enrolled using preconsent methods. Only 2 patients were enrolled into the study, and the study was terminated 1 month after enrollment of the first patient due to loss of funding. The article concludes that the utilization of preconsent in their study was “found to be infeasible”.                                                                       |
| Corneli et al.   | <i>In favour</i> of use of advance consent for research                  | Structured interviews detail that “patients and caregivers expressed no concerns about being approached in the ICU about a clinical trial on treatment for pneumonia before the patient was diagnosed with the condition”, and that “the IRB representatives expressed no ethical or regulatory concerns with the early enrollment strategy using advance consent”.<br>The article concludes that “early enrollment strategy with advance consent appears to be an acceptable approach among key stakeholders”.                                                                                                                                                         |
| Karlawish et al. | <i>No opinion</i> for or against the use of advance consent for research | The authors outline that “advance informed consent means, that at a time before enrollment, an investigator seeks the consent of a competent person who is a potential subject of a research trial.[...] Like advance directives for clinical care such as living wills, regulations could endorse advance directives for research.” They then explain that “a moral conflict can occur when an advance directive conflicts with substituted judgment or best interests principles and that “there are the practical limits, including that an advance directive cannot address every circumstance a potential subject faces and that many people do not execute them”. |
| McGehrin et al.  | <i>In favour</i> of use of advance consent for research                  | The article states that “one solution to preserving patient autonomy in acute stroke care is the advent of a stroke advance directive. An advance directive for acute stroke therapy was created at the University of California, San Diego (UCSD) in 2015 titled COAST (Coordinating Options for Acute Stroke Therapy). This 4-page form allows patients to document their preferences regarding acute stroke treatment interventions, as well as participation in clinical stroke trials, in a nonurgent setting and in advance of a potential stroke.”                                                                                                               |

## Experiences with advance consent

Corneli *et al* was the only study to report the results of empirical research, in that they conducted semi-structured interviews with 52 stakeholders including patients, caregivers, institutional review board representatives, clinical investigators and study coordinators about advance consent.<sup>27</sup> Stakeholders, including patients and caregivers, reported no concerns about being approached in advance regarding participation in a research study prior to developing the condition required for in enrollment – in this case, pneumonia. The authors therefore concluded that an early enrollment strategy with advance consent would be acceptable.

1  
2  
3 Cole *et al* presented the sole experience using advance consent for study enrollment.<sup>29</sup> The  
4 authors conducted an observational cohort study of psychiatric participants pre-consented for an  
5 RCT examining treatments for acute agitation in the Emergency department (ED). Eligible  
6 participants provided informed consent for enrolment in the RCT, which involved having a drug  
7 administered for agitation, in the event that they would present to the ED within the next 3 years  
8 with acute agitation. Potential participants could also be consented for the trial in real time, if  
9 they retained capacity to provide informed consent or if a legally authorized representative was  
10 present to provide consent. Over 1000 patients were screened for the study, and only 75 were  
11 found to be eligible to provide advance consent, 43 of whom did provide advance consent. No  
12 participant was enrolled into the study via advance consent, and only two participants were  
13 successfully enrolled into the trial by other methods of consent. The trial was terminated early, 1  
14 month after enrolling its first patient, due to loss of funding. Given that no participant was  
15 enrolled by advance consent, the authors concluded that it was not a feasible approach to study  
16 enrollment.  
17  
18  
19  
20  
21  
22  
23  
24  
25  
26  
27  
28

### 29 **Advance consent and emergency neurologic conditions**

30  
31  
32 The article by McGehrin *et al.* was the only paper that specifically focused on neurologic  
33 conditions. McGehrin *et al* proposed a 4-page advance directive document they call  
34 ‘Coordinating Options for Acute Stroke Therapy (COAST)’, which is designed to allow patients  
35 to document their preferences regarding acute stroke treatment, including participation in future  
36 clinical stroke trials.<sup>25</sup> The article did not describe what information would be recorded regarding  
37 preferences for involvement in future stroke trials, nor did it detail how this information would  
38 be utilized for future enrolment in research studies.  
39  
40  
41  
42  
43  
44  
45

## 46 **DISCUSSION**

47  
48 Our scoping review maps the existing literature on the use of advance consent for enrolling  
49 participants into RCTs for emergency conditions. The results of our review demonstrate that  
50 there has been minimal exploration of the use of advance consent for enrollment in RCTs for  
51 emergency conditions. We could only identify one study that had attempted the use of advance  
52 consent in an adult population,<sup>29</sup> and one study in which opinions about advance consent were  
53  
54  
55  
56  
57  
58  
59  
60

1  
2  
3 elicited.<sup>27</sup> No studies had endeavoured to use advance consent for enrollment into research in  
4 emergency neurological conditions.  
5  
6  
7

8 The limited literature on the use of advance consent may suggest that there are concerns  
9 surrounding feasibility, but we believe the issues raised by Cole *et al.* and Biros *et al.* are  
10 potentially remediable.<sup>26, 29</sup> For example, selecting conditions for which a clearly defined at-risk  
11 population exists, such as acute ischemic stroke, would likely enhance feasibility. A recent  
12 assessment of local data at a tertiary care centre in Ottawa (Ontario, Canada) also supports the  
13 feasibility of advance consent in selected at-risk populations, in this case neurologic  
14 emergencies. The data established that 5–7% of patients seen in the stroke prevention clinic with  
15 minor stroke or transient ischaemic attack presented to the emergency department with an acute  
16 stroke within 1 year of their clinic appointment. This data reflects a potential 100–150 candidates  
17 annually who could be consented in clinic using advance consent methods for RCTs pertaining  
18 to acute ischemic strokes in the emergency department. (“Advance consent for acute stroke  
19 trials”, *The Lancet Neurology*, 2021). Moreover, an electronic medical record could be used to  
20 document decisions about advance consent in such a way that it is obvious upon presentation to  
21 the emergency department. Because the study by Cole *et al.* failed to enroll a patient using  
22 advance consent, they conclude that the approach is not feasible; we believe it is important to  
23 note that they struggled to enroll patients into their study by any means and that this is unlikely  
24 owing simply to the use of advance consent. Biros *et al.* raise an important concern about  
25 patients being unable to consider consent carefully when potential enrollment is remote.  
26 However, Corneli *et al.* directly addressed this issue in their survey and found that nearly all  
27 patient and caregiver respondents were not concerned about a patient’s ability to understand  
28 consent information for a potential future trial.  
29  
30  
31  
32  
33  
34  
35  
36  
37  
38  
39  
40  
41  
42  
43  
44  
45

46 The strengths of our review are that we prospectively registered our study, utilized a thorough  
47 protocol, and systematically searched, screened and summarized the literature on advance  
48 consent for research in acute care RCTs. We also employed broad inclusion criteria which did  
49 not restrict the type of included publications in our review. This ensured that we were able to  
50 survey all of the available literature on our topic of interest. Our study was not without  
51 limitations. Despite our comprehensive search strategy, there was little literature on this topic,  
52  
53  
54  
55  
56  
57  
58  
59  
60

1  
2  
3 and due to the heterogeneity of study types ultimately included in our analysis, there is inherent  
4 risk of bias. Because we conducted a scoping review, we did not perform a specific risk of bias  
5 assessment of each individual manuscript identified and data synthesis was not performed.  
6  
7  
8  
9

10 Ultimately, we suspect that advance consent could offer several important advantages over  
11 existing trial recruitment methods. Most importantly, advance consent could create a more  
12 ethical system for trial enrollment by ensuring that patients' wishes to be enrolled or not enrolled  
13 into trials are respected even if they cannot express them at the time of a medical emergency.  
14 Advance consent could reduce the time required to enroll willing patients into trials of time-  
15 sensitive treatments, potentially leading to better individual outcomes. It could render research  
16 findings more generalizable by removing biases against more severely affected patients or non-  
17 accompanied patients. It could even allow RCTs to be completed more quickly, as enrollment  
18 rates may be enhanced leading to the more rapid determination of research results. Future studies  
19 could aim to assess the acceptability of advance consent to potential participants, along with the  
20 feasibility of enrolling potential research participants using this method of consent.  
21  
22  
23  
24  
25  
26  
27  
28  
29

30  
31 In summary, our scoping review demonstrates that there has been minimal exploration on the use  
32 of advanced consent for enrollment in RCTs for emergency conditions, and significant gaps in  
33 the literature remain. Furthermore, there have been no studies assessing the use of advance  
34 consent for enrollment in RCTs involving neurologic emergencies. Patients are caregivers appear  
35 open to participate in advance consent for emergency conditions.  
36  
37  
38  
39  
40  
41  
42  
43  
44  
45  
46  
47  
48  
49  
50  
51  
52  
53  
54  
55  
56  
57  
58  
59  
60



## DECLARATIONS

### **Ethics approval and consent to participate**

Not applicable.

### **Availability of data and materials**

Data sharing is not applicable to this article as no datasets were generated or analysed during the current study.

### **Competing interests**

The authors declare that they have no competing interests.

### **Funding**

This research received no specific grant from any funding agency in the public, commercial, or not-for-profit sectors.

JP is supported by a Mid-Career Award from the Heart and Stroke Foundation of Ontario.

### **Author contributions**

All authors made substantial contributions to the manuscript.

NN/BD/JP/DD/MS designed the research question, NN/BD/MS designed the eligibility criteria, BD/DD/MS designed the search strategy, NN/BD/MS designed the screening strategy, NN/RL/BD/MS came up with the data extraction items and NN/RL/BD/MS developed the data synthesis strategy. All authors contributed to analysis, drafting, editing and provided final approval.

### **Acknowledgements**

No acknowledgements.

## REFERENCES

1. Niznick N, Lun R, Dewar B, Dowlatshahi D, Shamy M. Advanced consent for participation in acute care randomised control trials: protocol for a scoping review. *BMJ Open*. Oct 16 2020;10(10):e039172. doi:10.1136/bmjopen-2020-039172
2. Dickert NW, Brown J, Cairns CB, et al. Confronting Ethical and Regulatory Challenges of Emergency Care Research With Conscious Patients. *Ann Emerg Med*. Apr 2016;67(4):538-45. doi:10.1016/j.annemergmed.2015.10.026
3. Mangset M, Forde R, Nessa J, Berge E, Wyller TB. I don't like that, it's tricking people too much...: acute informed consent to participation in a trial of thrombolysis for stroke. *J Med Ethics*. Oct 2008;34(10):751-6. doi:10.1136/jme.2007.023168
4. Wendler D, Dickert NW, Silbergleit R, Kim SY, Brown J. Targeted Consent for Research on Standard of Care Interventions in the Emergency Setting. *Crit Care Med*. Jan 2017;45(1):e105-e110. doi:10.1097/CCM.0000000000002023
5. Goyal M, Demchuk AM, Menon BK, et al. Randomized assessment of rapid endovascular treatment of ischemic stroke. *N Engl J Med*. Mar 12 2015;372(11):1019-30. doi:10.1056/NEJMoa1414905
6. Shamy MCF, Dewar B, Chevrier S, et al. Deferral of Consent in Acute Stroke Trials. *Stroke*. Apr 2019;50(4):1017-1020. doi:10.1161/STROKEAHA.118.024096
7. Burns KE, Zubrinich C, Marshall J, Cook D. The 'Consent to Research' paradigm in critical care: challenges and potential solutions. *Intensive Care Med*. Oct 2009;35(10):1655-8. doi:10.1007/s00134-009-1562-9
8. 61 21 CFR Part 50. Protection of Human Subjects: informed consent and waiver of consent requirements in certain emergency research; Final rules. Food and Drug Administration; Federal Register. 51498–52332 (October 2, 1996).
9. World Medical Association. The Declaration of Helsinki: ethical principles for medical research involving human subjects. 2008. <https://www.wma.net/policies-post/wma-declaration-of-helsinki-ethical-principles-for-medical-research-involving-human-subjects/>
10. Beauchamp TL, Fost N, Robertson JA. The ambiguities of 'deferred consent'. *IRB*. Aug-Sep 1980;2(7):6-9.
11. van Belle G, Mentzelopoulos SD, Aufderheide T, May S, Nichol G. International variation in policies and practices related to informed consent in acute cardiovascular research: Results from a 44 country survey. *Resuscitation*. Jun 2015;91:76-83. doi:10.1016/j.resuscitation.2014.11.029
12. Bravo G, Dubois MF, Wildeman SM, et al. Research with decisionally incapacitated older adults: practices of Canadian research ethics boards. *IRB*. Nov-Dec 2010;32(6):1-8.

13. Largent EA, Wendler D, Emanuel E, Miller FG. Is emergency research without initial consent justified?: the consent substitute model. *Arch Intern Med*. Apr 26 2010;170(8):668-74. doi:10.1001/archinternmed.2010.80
14. Saks ER, Dunn LB, Wimer J, Gonzales M, Kim S. Proxy consent to research: the legal landscape. *Yale J Health Policy Law Ethics*. Winter 2008;8(1):37-92.
15. Government of Canada. Tri-council policy statement on ethical conduct for research involving human. Section 3.11. February 5, 2016. Accessed March 15, 2020. <http://www.pre.ethics.gc.ca/eng/policy-politique/initiatives/tcps2-eptc2/Default/>
16. Sachs GA. Advance consent for dementia research. *Alzheimer Dis Assoc Disord*. 1994;8(Suppl. 4):19-27.
17. Buller T. Advance consent, critical interests and dementia research. *J Med Ethics*. Aug 2015;41(8):701-7. doi:10.1136/medethics-2014-102024
18. Stocking CB, Hougham GW, Danner DD, Patterson MB, Whitehouse PJ, Sachs GA. Speaking of research advance directives: planning for future research participation. *Neurology*. May 9 2006;66(9):1361-6. doi:10.1212/01.wnl.0000216424.66098.55
19. Pierce R. A changing landscape for advance directives in dementia research. *Soc Sci Med*. Feb 2010;70(4):623-30. doi:10.1016/j.socscimed.2009.10.037
20. Tricco AC, Lillie E, Zarin W, et al. PRISMA Extension for Scoping Reviews (PRISMA-ScR): Checklist and Explanation. *Ann Intern Med*. Oct 2 2018;169(7):467-473. doi:10.7326/M18-0850
21. Arksey HOM, L. Scoping studies: towards a methodological framework. *International Journal of Social Research Methodology*. 2005;8(1):19-32.
22. Levac D, Colquhoun H, O'Brien KK. Scoping studies: advancing the methodology. *Implement Sci*. Sep 20 2010;5:69. doi:10.1186/1748-5908-5-69
23. Covidence systematic review software, Veritas Health Innovation, Melbourne, Australia. Available at [www.covidence.org](http://www.covidence.org).
24. Backlar P. A choice of one's own research advance directives: anticipatory planning for research subjects with fluctuating or prospective decisionmaking impairments. *Account Res*. 1999;7(2-4):117-28. doi:10.1080/08989629908573946
25. McGehrin K, Spokoyny I, Meyer BC, Agrawal K. The COAST stroke advance directive: A novel approach to preserving patient autonomy. *Neurol Clin Pract*. Dec 2018;8(6):521-526. doi:10.1212/CPJ.0000000000000549
26. Biros MH, Lewis RJ, Olson CM, Runge JW, Cummins RO, Fost N. Informed consent in emergency research. Consensus statement from the Coalition Conference of Acute Resuscitation

1  
2  
3 and Critical Care Researchers. *JAMA*. Apr 26 1995;273(16):1283-7.  
4 doi:10.1001/jama.273.16.1283  
5

6  
7 27. Corneli A, Perry B, Collyar D, et al. Assessment of the Perceived Acceptability of an  
8 Early Enrollment Strategy Using Advance Consent in Health Care-Associated Pneumonia.  
9 *JAMA Netw Open*. Dec 7 2018;1(8):e185816. doi:10.1001/jamanetworkopen.2018.5816  
10

11 28. Karlawish JH, Sachs GA. Research on the cognitively impaired: lessons and warnings  
12 from the emergency research debate. *J Am Geriatr Soc*. Apr 1997;45(4):474-81.  
13 doi:10.1111/j.1532-5415.1997.tb05174.x  
14

15 29. Cole JB, Klein LR, Mullinax SZ, Nordstrom KD, Driver BE, Wilson MP. Study  
16 Enrollment When "Preconsent" Is Utilized for a Randomized Clinical Trial of Two Treatments  
17 for Acute Agitation in the Emergency Department. *Acad Emerg Med*. May 2019;26(5):559-566.  
18 doi:10.1111/acem.13673  
19  
20  
21  
22  
23  
24  
25  
26  
27  
28  
29  
30  
31  
32  
33  
34  
35  
36  
37  
38  
39  
40  
41  
42  
43  
44  
45  
46  
47  
48  
49  
50  
51  
52  
53  
54  
55  
56  
57  
58  
59  
60

1  
2  
3  
4  
5  
6  
7  
8  
9  
10  
11  
12  
13  
14  
15  
16  
17  
18  
19  
20  
21  
22  
23  
24  
25  
26  
27  
28  
29  
30  
31  
32  
33  
34  
35  
36  
37  
38  
39  
40  
41  
42  
43  
44  
45  
46  
47  
48  
49  
50  
51  
52  
53  
54  
55  
56  
57  
58  
59  
60

**Figure Legend**

Figure 1: Preferred reporting items for Systematic Reviews and Meta Analyses Flow Diagram

For peer review only

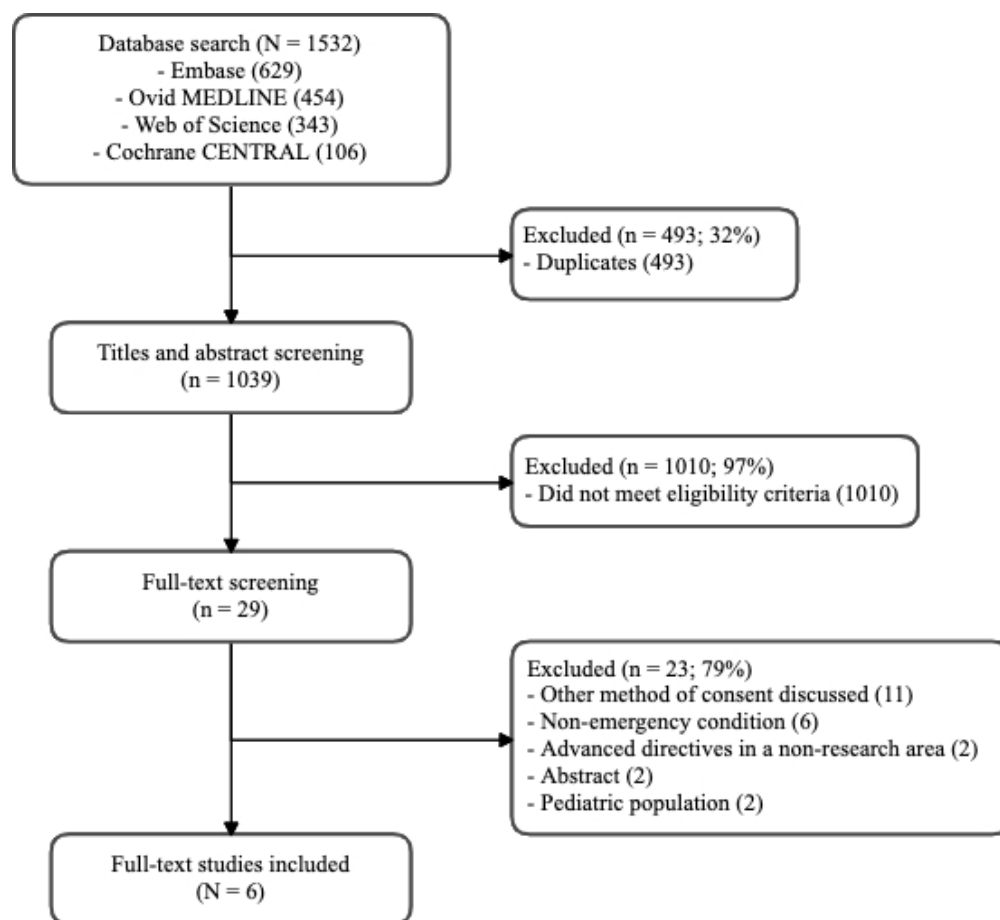

Figure 1: Preferred reporting items for Systematic Reviews and Meta Analyses Flow Diagram

195x178mm (72 x 72 DPI)

1  
2  
3  
4  
5  
6  
7  
8  
9  
10  
11  
12  
13  
14  
15  
16  
17  
18  
19  
20  
21  
22  
23  
24  
25  
26  
27  
28  
29  
30  
31  
32  
33  
34  
35  
36  
37  
38  
39  
40  
41  
42  
43  
44  
45  
46  
47  
48  
49  
50  
51  
52  
53  
54  
55  
56  
57  
58  
59  
60

**SUPPLEMENTARY MATERIAL**

**Supplementary Material Legend**

Supplementary Table 1: Search strategies

Supplementary Table 2: Data charting form

For peer review only

Supplementary Table 1. Search strategy

| Database                                                      | Search terms                                                                                          | Results    |
|---------------------------------------------------------------|-------------------------------------------------------------------------------------------------------|------------|
| <b>Embase Classic + Embase<br/>(1947 – February 10, 2020)</b> | 1. ((advance* or prior or prospective*) adj3 consent).tw.                                             | 2844       |
|                                                               | 2. (preconsent or pre-consent).tw.                                                                    | 43         |
|                                                               | 3. Advance Directives/ and Informed Consent/                                                          | 1361       |
|                                                               | 4. 1 or 2 or 3                                                                                        | 4206       |
|                                                               | 5. incapacitated.tw.                                                                                  | 1984       |
|                                                               | 6. *heart infarction/                                                                                 | 112881     |
|                                                               | 7. (cardiac arrest or heart arrest or heart attack or asystole or cardiopulmonary arrest*).tw.        | 67289      |
|                                                               | 8. (myocardial infarct* or myocardial isch*).tw.                                                      | 318778     |
|                                                               | 9. (cardiac death or heart death or arrhythmic death).tw.                                             | 41772      |
|                                                               | 10. *dementia/                                                                                        | 54639      |
|                                                               | 11. (dementia or alzheimer*).tw.                                                                      | 292062     |
|                                                               | 12. *cerebrovascular accident/                                                                        | 78550      |
|                                                               | 13. (stroke or intracerebral h?emorrhage).tw.                                                         | 385677     |
|                                                               | 14. *brain hemorrhage/                                                                                | 33439      |
|                                                               | 15. *epileptic state/                                                                                 | 10938      |
|                                                               | 16. (epilepsy or status epilepticus).tw.                                                              | 165346     |
|                                                               | 17. *subarachnoid hemorrhage/                                                                         | 21563      |
|                                                               | 18. subarachnoid h?emorrhage.tw.                                                                      | 32523      |
|                                                               | 19. exp *injury/                                                                                      | 1111912    |
|                                                               | 20. ((neurolog* or brain) adj3 (emergenc* or injur* or trauma*)).tw. (                                | 114863     |
|                                                               | 21. emergency care/                                                                                   | 44041      |
|                                                               | 22. (emergency department* or emergency treatment* or emergency setting* or emergency situation*).tw. | 149499     |
|                                                               | 23. emergency treatment/                                                                              | 17365      |
|                                                               | 24. emergenc*.ti.                                                                                     | 142870     |
|                                                               | 25. *human experiment/                                                                                | 5564       |
|                                                               | 26. *"clinical trial (topic)"/                                                                        | 10702      |
|                                                               | 27. *emergency medicine/                                                                              | 27031      |
|                                                               | 28. *emergency ward/                                                                                  | 30666      |
|                                                               | 29. *clinical research/ or *medical research/                                                         | 83362      |
|                                                               | 30. or/5-29                                                                                           | 2684505    |
|                                                               | 31. 4 and 30                                                                                          | <b>629</b> |
| <b>Ovid MEDLINE(R) ALL<br/>(1946 – February 10, 2020)</b>     | 1. ((advance* or prior or prospective*) adj3 consent).tw.                                             | 1159       |
|                                                               | 2. (preconsent or pre-consent).tw,kf.                                                                 | 25         |
|                                                               | 3. Advance Directives/ and Informed Consent/                                                          | 633        |
|                                                               | 4. or/1-3                                                                                             | 1786       |
|                                                               | 5. incapacitated.tw.                                                                                  | 1254       |
|                                                               | 6. Myocardial Infarction/                                                                             | 163865     |
|                                                               | 7. (cardiac arrest or heart arrest or heart attack or asystole or cardiopulmonary arrest*).tw.        | 41358      |
|                                                               | 8. (myocardial infarct* or myocardial isch*).tw,kw.                                                   | 218769     |
|                                                               | 9. (cardiac death or heart death or arrhythmic death).tw,kw.                                          | 23707      |
|                                                               | 10. Dementia/ or (dementia or alzheimer*).tw,kf.                                                      | 220951     |
|                                                               | 11. exp Stroke/ or (stroke or intracerebral h?emorrhage).tw,kf.                                       | 279104     |
|                                                               | 12. exp Cerebral Hemorrhage/ or Status Epilepticus/                                                   | 41146      |



|    |                                                                                                       |            |
|----|-------------------------------------------------------------------------------------------------------|------------|
| 1  |                                                                                                       |            |
| 2  |                                                                                                       |            |
| 3  |                                                                                                       |            |
| 4  |                                                                                                       |            |
| 5  |                                                                                                       |            |
| 6  |                                                                                                       |            |
| 7  |                                                                                                       |            |
| 8  |                                                                                                       |            |
| 9  |                                                                                                       |            |
| 10 |                                                                                                       |            |
| 11 |                                                                                                       |            |
| 12 |                                                                                                       |            |
| 13 |                                                                                                       |            |
| 14 |                                                                                                       |            |
| 15 |                                                                                                       |            |
| 16 |                                                                                                       |            |
| 17 |                                                                                                       |            |
| 18 |                                                                                                       |            |
| 19 |                                                                                                       |            |
| 20 |                                                                                                       |            |
| 21 |                                                                                                       |            |
| 22 |                                                                                                       |            |
| 23 |                                                                                                       |            |
| 24 |                                                                                                       |            |
| 25 |                                                                                                       |            |
| 26 |                                                                                                       |            |
| 27 |                                                                                                       |            |
| 28 |                                                                                                       |            |
| 29 |                                                                                                       |            |
| 30 |                                                                                                       |            |
| 31 |                                                                                                       |            |
| 32 |                                                                                                       |            |
| 33 |                                                                                                       |            |
| 34 |                                                                                                       |            |
| 35 |                                                                                                       |            |
| 36 |                                                                                                       |            |
| 37 |                                                                                                       |            |
| 38 |                                                                                                       |            |
| 39 |                                                                                                       |            |
| 40 |                                                                                                       |            |
| 41 |                                                                                                       |            |
| 42 |                                                                                                       |            |
| 43 |                                                                                                       |            |
| 44 |                                                                                                       |            |
| 45 |                                                                                                       |            |
| 46 |                                                                                                       |            |
| 47 |                                                                                                       |            |
| 48 |                                                                                                       |            |
| 49 |                                                                                                       |            |
| 50 |                                                                                                       |            |
| 51 |                                                                                                       |            |
| 52 |                                                                                                       |            |
| 53 |                                                                                                       |            |
| 54 |                                                                                                       |            |
| 55 |                                                                                                       |            |
| 56 |                                                                                                       |            |
| 57 |                                                                                                       |            |
| 58 |                                                                                                       |            |
| 59 |                                                                                                       |            |
| 60 |                                                                                                       |            |
|    | 13. (epilepsy or status epilepticus).tw,kw.                                                           | 109855     |
|    | 14. exp Subarachnoid Hemorrhage/ or subarachnoid h?emorrhage.tw,kw.                                   | 29908      |
|    | 15. exp "Wounds and Injuries"/                                                                        | 889722     |
|    | 16. ((neurolog* or brain) adj3 (emergenc* or injur* or trauma*)).tw.                                  | 79721      |
|    | 17. Emergency Service, Hospital/                                                                      | 66069      |
|    | 18. Emergencies/ or Emergency Medicine/ or exp Emergency Treatment/ (                                 | 164845     |
|    | 19. (emergency department* or emergency treatment* or emergency setting* or emergency situation*).tw. | 97671      |
|    | 20. emergenc*.ti.                                                                                     | 109009     |
|    | 21. exp Human Experimentation/                                                                        | 12414      |
|    | 22. Clinical Trials as Topic/ or Biomedical Research/                                                 | 257452     |
|    | 23. or/5-22                                                                                           | 2295131    |
|    | 24. 4 and 23                                                                                          | <b>454</b> |
|    | <b>EBM Review – Cochrane Central Register of Controlled Trials (February 10, 2020)</b>                |            |
|    | 1. ((advance* or prior or prospective*) adj3 consent).tw.                                             | 3608       |
|    | 2. (preconsent or pre-consent).tw.                                                                    | 15         |
|    | 3. Advance Directives/ and Informed Consent/                                                          | 1          |
|    | 4. or/1-3                                                                                             | 3621       |
|    | 5. incapacitated.tw.                                                                                  | 100        |
|    | 6. Myocardial Infarction/                                                                             | 10416      |
|    | 7. (cardiac arrest or heart arrest or heart attack or asystole or cardiopulmonary arrest*).tw. (      | 4770       |
|    | 8. (myocardial infarct* or myocardial isch*).tw.                                                      | 30889      |
|    | 9. (cardiac death or heart death or arrhythmic death).tw.                                             | 3461       |
|    | 10. Dementia/ or (dementia or alzheimer*).tw.                                                         | 18563      |
|    | 11. exp Stroke/ or (stroke or intracerebral h?emorrhage).tw.                                          | 52260      |
|    | 12. exp Cerebral Hemorrhage/ or Status Epilepticus/                                                   | 1030       |
|    | 13. (epilepsy or status epilepticus).tw,kw.                                                           | 6807       |
|    | 14. exp Subarachnoid Hemorrhage/ or subarachnoid h?emorrhage.tw,kw.                                   | 1950       |
|    | 15. exp "Wounds and Injuries"/                                                                        | 22743      |
|    | 16. ((neurolog* or brain) adj3 (emergenc* or injur* or trauma*)).tw.                                  | 6550       |
|    | 17. Emergency Service, Hospital/                                                                      | 2083       |
|    | 18. Emergencies/ or Emergency Medicine/ or exp Emergency Treatment/                                   | 6536       |
|    | 19. (emergency department* or emergency treatment* or emergency setting* or emergency situation*).tw. | 11275      |
|    | 20. emergenc*.ti.                                                                                     | 7206       |
|    | 21. exp Human Experimentation/                                                                        | 133        |
|    | 22. Clinical Trials as Topic/ or Biomedical Research/                                                 | 33365      |
|    | 23. or/5-22                                                                                           | 180502     |
|    | 24. 4 and 23                                                                                          | 309        |
|    | 25. (EUCTR* or IRCT* or ISRCT* or CTRI* or JPRN* or DRKS* or CHICTR* or NCT* or ACTRN*).au.           | 300851     |
|    | 26. 24 not 25                                                                                         | <b>106</b> |
|    | <b>Web of Science (February 10, 2020)</b>                                                             |            |
|    | TS=(preconsent or pre-consent)                                                                        | 33         |
|    | TS=((advance* or prior or prospective*) NEAR/3 consent)                                               | 1870       |

|    |                                                             |            |
|----|-------------------------------------------------------------|------------|
| 1  |                                                             |            |
| 2  |                                                             |            |
| 3  | #2 OR #1                                                    | 1899       |
| 4  | TS=incapacitated                                            | 3429       |
| 5  | TS=("cardiac arrest" or "heart arrest" or "heart attack" or | 49571      |
| 6  | asystole or "cardiopulmonary arrest*")                      |            |
| 7  | TS=("myocardial infarct*" or "myocardial isch*").           | 326927     |
| 8  | TS=("cardiac death" or "heart death" or "arrhythmic death") | 31798      |
| 9  | I                                                           |            |
| 10 | TS=(dementia or alzheimer*)                                 | 319597     |
| 11 | TS=(stroke or "intracerebral h?emorrhage")                  | 345906     |
| 12 | TS=(epilepsy or "status epilepticus")                       | 149826     |
| 13 | TS="subarachnoid h?emorrhage*"                              | 3980       |
| 14 | TS=((neurolog* or brain) NEAR/3 (emergenc* or injur* or     | 118137     |
| 15 | trauma*))                                                   |            |
| 16 | TS= ("emergency department*" or "emergency treatment*" or   | 107877     |
| 17 | "emergency setting*" or "emergency situation*")             |            |
| 18 | TI=emergenc*                                                | 153160     |
| 19 | TS=clinical research                                        | 346041     |
| 20 | TS="human experiment*"                                      | 2638       |
| 21 | I                                                           |            |
| 22 | #16 OR #15 OR #14 OR #13 OR #12 OR #11 OR #10 OR #9         | 1747826    |
| 23 | OR #8 OR #7 OR #6 OR #5 OR #4                               |            |
| 24 | #17 AND #3                                                  | <b>343</b> |
| 25 |                                                             |            |
| 26 |                                                             |            |
| 27 |                                                             |            |
| 28 |                                                             |            |
| 29 |                                                             |            |
| 30 |                                                             |            |
| 31 |                                                             |            |
| 32 |                                                             |            |
| 33 |                                                             |            |
| 34 |                                                             |            |
| 35 |                                                             |            |
| 36 |                                                             |            |
| 37 |                                                             |            |
| 38 |                                                             |            |
| 39 |                                                             |            |
| 40 |                                                             |            |
| 41 |                                                             |            |
| 42 |                                                             |            |
| 43 |                                                             |            |
| 44 |                                                             |            |
| 45 |                                                             |            |
| 46 |                                                             |            |
| 47 |                                                             |            |
| 48 |                                                             |            |
| 49 |                                                             |            |
| 50 |                                                             |            |
| 51 |                                                             |            |
| 52 |                                                             |            |
| 53 |                                                             |            |
| 54 |                                                             |            |
| 55 |                                                             |            |
| 56 |                                                             |            |
| 57 |                                                             |            |
| 58 |                                                             |            |
| 59 |                                                             |            |
| 60 |                                                             |            |

**Supplementary Table 2.** Data charting form

| SECTION                                        | DATA ITEM                                    | EXTRACTED DATA                                                                                                                                                      |
|------------------------------------------------|----------------------------------------------|---------------------------------------------------------------------------------------------------------------------------------------------------------------------|
| <b>Study identification</b>                    |                                              |                                                                                                                                                                     |
|                                                | Paper number                                 |                                                                                                                                                                     |
|                                                | Journal - Title                              |                                                                                                                                                                     |
|                                                | Article - Title                              |                                                                                                                                                                     |
|                                                | Author last name                             |                                                                                                                                                                     |
|                                                | Type of author (MD/PhD/Other)                | MD<br>PhD<br>Other                                                                                                                                                  |
|                                                | Publication date (Year)                      |                                                                                                                                                                     |
|                                                | Country of Origin                            | Canada<br>United States<br>United Kingdom<br>Other country in North or South America<br>Other country in Europe<br>Other country in Asia<br>Other country in Africa |
| <b>Study characteristics &amp; methodology</b> |                                              |                                                                                                                                                                     |
| <i>Medical condition</i>                       | What is the condition?                       | Ischemic Stroke<br>ICH<br>Seizure<br>Cardiac<br>Respiratory<br>Psychiatric<br>None [no mentioned condition]<br>Other                                                |
|                                                | Is the condition neurological?               | Yes<br>No                                                                                                                                                           |
| <i>Paper characteristics</i>                   | Type of research paper                       | RCT<br>Cohort<br>Case-Control<br>Survey<br>Interview<br>Commentary<br>Philosophical argument<br>Historical review<br>Other                                          |
|                                                | If clinical study, was Advance consent used? | Yes<br>No<br>Not applicable                                                                                                                                         |
| <b>Results</b>                                 |                                              |                                                                                                                                                                     |
|                                                | Author disposition                           | In favour of advance consent<br>Against advance consent                                                                                                             |

|  |                     |                                                                  |
|--|---------------------|------------------------------------------------------------------|
|  |                     | No opinion mentioned                                             |
|  | Specific statements | Extract any paragraph of text where advance consent is discussed |

ICH = intracerebral hemorrhage; RCT = randomized control trial

For peer review only

## Preferred Reporting Items for Systematic reviews and Meta-Analyses extension for Scoping Reviews (PRISMA-ScR) Checklist

| SECTION                                               | ITEM | PRISMA-ScR CHECKLIST ITEM                                                                                                                                                                                                                                                                                  | REPORTED ON PAGE # |
|-------------------------------------------------------|------|------------------------------------------------------------------------------------------------------------------------------------------------------------------------------------------------------------------------------------------------------------------------------------------------------------|--------------------|
| <b>TITLE</b>                                          |      |                                                                                                                                                                                                                                                                                                            |                    |
| Title                                                 | 1    | Identify the report as a scoping review.                                                                                                                                                                                                                                                                   |                    |
| <b>ABSTRACT</b>                                       |      |                                                                                                                                                                                                                                                                                                            |                    |
| Structured summary                                    | 2    | Provide a structured summary that includes (as applicable): background, objectives, eligibility criteria, sources of evidence, charting methods, results, and conclusions that relate to the review questions and objectives.                                                                              |                    |
| <b>INTRODUCTION</b>                                   |      |                                                                                                                                                                                                                                                                                                            |                    |
| Rationale                                             | 3    | Describe the rationale for the review in the context of what is already known. Explain why the review questions/objectives lend themselves to a scoping review approach.                                                                                                                                   |                    |
| Objectives                                            | 4    | Provide an explicit statement of the questions and objectives being addressed with reference to their key elements (e.g., population or participants, concepts, and context) or other relevant key elements used to conceptualize the review questions and/or objectives.                                  |                    |
| <b>METHODS</b>                                        |      |                                                                                                                                                                                                                                                                                                            |                    |
| Protocol and registration                             | 5    | Indicate whether a review protocol exists; state if and where it can be accessed (e.g., a Web address); and if available, provide registration information, including the registration number.                                                                                                             |                    |
| Eligibility criteria                                  | 6    | Specify characteristics of the sources of evidence used as eligibility criteria (e.g., years considered, language, and publication status), and provide a rationale.                                                                                                                                       |                    |
| Information sources*                                  | 7    | Describe all information sources in the search (e.g., databases with dates of coverage and contact with authors to identify additional sources), as well as the date the most recent search was executed.                                                                                                  |                    |
| Search                                                | 8    | Present the full electronic search strategy for at least 1 database, including any limits used, such that it could be repeated.                                                                                                                                                                            |                    |
| Selection of sources of evidence†                     | 9    | State the process for selecting sources of evidence (i.e., screening and eligibility) included in the scoping review.                                                                                                                                                                                      |                    |
| Data charting process‡                                | 10   | Describe the methods of charting data from the included sources of evidence (e.g., calibrated forms or forms that have been tested by the team before their use, and whether data charting was done independently or in duplicate) and any processes for obtaining and confirming data from investigators. |                    |
| Data items                                            | 11   | List and define all variables for which data were sought and any assumptions and simplifications made.                                                                                                                                                                                                     |                    |
| Critical appraisal of individual sources of evidence§ | 12   | If done, provide a rationale for conducting a critical appraisal of included sources of evidence; describe the methods used and how this information was used in any data synthesis (if appropriate).                                                                                                      |                    |
| Synthesis of results                                  | 13   | Describe the methods of handling and summarizing the data that were charted.                                                                                                                                                                                                                               |                    |

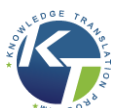

| SECTION                                       | ITEM | PRISMA-ScR CHECKLIST ITEM                                                                                                                                                                       | REPORTED ON PAGE # |
|-----------------------------------------------|------|-------------------------------------------------------------------------------------------------------------------------------------------------------------------------------------------------|--------------------|
| <b>RESULTS</b>                                |      |                                                                                                                                                                                                 |                    |
| Selection of sources of evidence              | 14   | Give numbers of sources of evidence screened, assessed for eligibility, and included in the review, with reasons for exclusions at each stage, ideally using a flow diagram.                    |                    |
| Characteristics of sources of evidence        | 15   | For each source of evidence, present characteristics for which data were charted and provide the citations.                                                                                     |                    |
| Critical appraisal within sources of evidence | 16   | If done, present data on critical appraisal of included sources of evidence (see item 12).                                                                                                      |                    |
| Results of individual sources of evidence     | 17   | For each included source of evidence, present the relevant data that were charted that relate to the review questions and objectives.                                                           |                    |
| Synthesis of results                          | 18   | Summarize and/or present the charting results as they relate to the review questions and objectives.                                                                                            |                    |
| <b>DISCUSSION</b>                             |      |                                                                                                                                                                                                 |                    |
| Summary of evidence                           | 19   | Summarize the main results (including an overview of concepts, themes, and types of evidence available), link to the review questions and objectives, and consider the relevance to key groups. |                    |
| Limitations                                   | 20   | Discuss the limitations of the scoping review process.                                                                                                                                          |                    |
| Conclusions                                   | 21   | Provide a general interpretation of the results with respect to the review questions and objectives, as well as potential implications and/or next steps.                                       |                    |
| <b>FUNDING</b>                                |      |                                                                                                                                                                                                 |                    |
| Funding                                       | 22   | Describe sources of funding for the included sources of evidence, as well as sources of funding for the scoping review. Describe the role of the funders of the scoping review.                 |                    |

JBI = Joanna Briggs Institute; PRISMA-ScR = Preferred Reporting Items for Systematic reviews and Meta-Analyses extension for Scoping Reviews.

\* Where *sources of evidence* (see second footnote) are compiled from, such as bibliographic databases, social media platforms, and Web sites.

† A more inclusive/heterogeneous term used to account for the different types of evidence or data sources (e.g., quantitative and/or qualitative research, expert opinion, and policy documents) that may be eligible in a scoping review as opposed to only studies. This is not to be confused with *information sources* (see first footnote).

‡ The frameworks by Arksey and O'Malley (6) and Levac and colleagues (7) and the JBI guidance (4, 5) refer to the process of data extraction in a scoping review as data charting.

§ The process of systematically examining research evidence to assess its validity, results, and relevance before using it to inform a decision. This term is used for items 12 and 19 instead of "risk of bias" (which is more applicable to systematic reviews of interventions) to include and acknowledge the various sources of evidence that may be used in a scoping review (e.g., quantitative and/or qualitative research, expert opinion, and policy document).

From: Tricco AC, Lillie E, Zarin W, O'Brien KK, Colquhoun H, Levac D, et al. PRISMA Extension for Scoping Reviews (PRISMA-ScR): Checklist and Explanation. *Ann Intern Med.* 2018;169:467–473. doi: [10.7326/M18-0850](https://doi.org/10.7326/M18-0850).

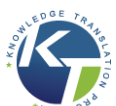

# BMJ Open

## ADVANCE CONSENT FOR PARTICIPATION IN RANDOMIZED CONTROLLED TRIALS FOR EMERGENCY CONDITIONS: A SCOPING REVIEW

|                                 |                                                                                                                                                                                                                                                                                                                                                                                                                                                                                                                                                                                                            |
|---------------------------------|------------------------------------------------------------------------------------------------------------------------------------------------------------------------------------------------------------------------------------------------------------------------------------------------------------------------------------------------------------------------------------------------------------------------------------------------------------------------------------------------------------------------------------------------------------------------------------------------------------|
| Journal:                        | <i>BMJ Open</i>                                                                                                                                                                                                                                                                                                                                                                                                                                                                                                                                                                                            |
| Manuscript ID                   | bmjopen-2022-066742.R1                                                                                                                                                                                                                                                                                                                                                                                                                                                                                                                                                                                     |
| Article Type:                   | Original research                                                                                                                                                                                                                                                                                                                                                                                                                                                                                                                                                                                          |
| Date Submitted by the Author:   | 23-Nov-2022                                                                                                                                                                                                                                                                                                                                                                                                                                                                                                                                                                                                |
| Complete List of Authors:       | Niznick, Naomi; Ottawa Hospital, Division of Neurology, Department of Medicine<br>Lun, Ronda; Ottawa Hospital, Division of Neurology, Department of Medicine<br>Dewar, Brian; Ottawa Hospital Research Institute; Ottawa Hospital Research Institute<br>Perry, Jeffrey; Ottawa Hospital, Department of Emergency Medicine; Ottawa Hospital Research Institute<br>Dowlatshahi, Dar; Ottawa Hospital, Division of Neurology, Department of Medicine; Ottawa Hospital Research Institute<br>Shamy, Michel; Ottawa Hospital Research Institute; Ottawa Hospital, Division of Neurology, Department of Medicine |
| <b>Primary Subject Heading</b>: | Ethics                                                                                                                                                                                                                                                                                                                                                                                                                                                                                                                                                                                                     |
| Secondary Subject Heading:      | Emergency medicine, Neurology                                                                                                                                                                                                                                                                                                                                                                                                                                                                                                                                                                              |
| Keywords:                       | MEDICAL ETHICS, ACCIDENT & EMERGENCY MEDICINE, NEUROLOGY                                                                                                                                                                                                                                                                                                                                                                                                                                                                                                                                                   |
|                                 |                                                                                                                                                                                                                                                                                                                                                                                                                                                                                                                                                                                                            |

SCHOLARONE™  
Manuscripts



I, the Submitting Author has the right to grant and does grant on behalf of all authors of the Work (as defined in the below author licence), an exclusive licence and/or a non-exclusive licence for contributions from authors who are: i) UK Crown employees; ii) where BMJ has agreed a CC-BY licence shall apply, and/or iii) in accordance with the terms applicable for US Federal Government officers or employees acting as part of their official duties; on a worldwide, perpetual, irrevocable, royalty-free basis to BMJ Publishing Group Ltd ("BMJ") its licensees and where the relevant Journal is co-owned by BMJ to the co-owners of the Journal, to publish the Work in this journal and any other BMJ products and to exploit all rights, as set out in our [licence](#).

The Submitting Author accepts and understands that any supply made under these terms is made by BMJ to the Submitting Author unless you are acting as an employee on behalf of your employer or a postgraduate student of an affiliated institution which is paying any applicable article publishing charge ("APC") for Open Access articles. Where the Submitting Author wishes to make the Work available on an Open Access basis (and intends to pay the relevant APC), the terms of reuse of such Open Access shall be governed by a Creative Commons licence – details of these licences and which [Creative Commons](#) licence will apply to this Work are set out in our licence referred to above.

Other than as permitted in any relevant BMJ Author's Self Archiving Policies, I confirm this Work has not been accepted for publication elsewhere, is not being considered for publication elsewhere and does not duplicate material already published. I confirm all authors consent to publication of this Work and authorise the granting of this licence.



1  
2  
3 **ADVANCE CONSENT FOR PARTICIPATION IN RANDOMIZED CONTROLLED**  
4 **TRIALS FOR EMERGENCY CONDITIONS: A SCOPING REVIEW**  
5  
6  
7

8 **Authors:** Naomi Niznick MD<sup>1</sup>; Ronda Lun MD<sup>1</sup>; Brian Dewar MLIS<sup>2</sup>; Jeffrey J. Perry MD  
9 MSc<sup>2,3</sup>; Dar Dowlatshahi MD PhD<sup>1,2</sup>; Michel C. F. Shamy MD MA<sup>1,2</sup>  
10  
11

12  
13 <sup>1</sup> Division of Neurology, Department of Medicine, The Ottawa Hospital, Ottawa, Canada

14 <sup>2</sup> Ottawa Hospital Research Institute, The Ottawa Hospital, Ottawa, Canada

15 <sup>3</sup> Department of Emergency Medicine, The Ottawa Hospital, Ottawa, Canada  
16  
17  
18  
19  
20  
21  
22  
23

24 **Word count:** 2,824

25 **Figures:** 1

26 **Tables:** 3  
27  
28  
29  
30  
31  
32  
33  
34  
35  
36  
37

38 **Corresponding author:**

39 Naomi Niznick, MD.

40 Division of Neurology – The Ottawa Hospital

41 The Ottawa Hospital Civic Campus, 1053 Carling Avenue, Ottawa, ON, Canada, K1Y 4E9

42 naniznick@toh.ca  
43  
44

45 Phone: (613) 761-4777 // Fax: 613-761-5403  
46  
47  
48  
49  
50  
51  
52  
53  
54

55 **Keywords:** Consent; advance directives; research ethics; emergencies; scoping review.  
56  
57  
58  
59  
60

## ABSTRACT

**Objectives:** Advance consent is a recognized method of obtaining informed consent for participation in research, whereby a potential participant provides consent for future involvement in a study contingent on qualifying for the study's inclusion criteria on a later date. The goal of this study is to map the existing literature on the use of advance consent for enrollment in randomized control trials (RCTs) for emergency conditions.

**Design:** Scoping review designed in accordance with the PRISMA-Extension for Scoping Reviews guidelines.

**Data Sources:** We searched electronic databases including MEDLINE, EMBASE, Web of Science and the Cochrane Register of Clinical Trials from inception to February 10, 2020.

**Eligibility Criteria:** Eligible studies included articles that discussed or employed the use of advance consent for enrolment in RCTs related to emergency conditions. There were no restrictions on the type of eligible study. Data was extracted directly from included papers using a standardized data charting form. We produced a narrative review including article type and authors' dispositions towards advance consent.

**Results:** Our search yielded 1,039 titles with duplicates removed. Six articles met inclusion criteria. Three articles discussed the theoretical use of research advance directives in emergency conditions, one article evaluated stakeholders' perceptions of advance consent and one article described a method for patients to document their preferences for participation in future research. Only one study employed advance consent to enroll participants into a clinical trial for an emergency condition.

**Conclusion:** Our review demonstrates that there has been minimal exploration of advance consent for enrollment in RCTs for emergency conditions. Future studies could aim to assess the acceptability of advance consent to participants, along with the feasibility of enrolling research participants using this method of consent.

**Protocol:** The protocol for this scoping review was published a priori.

## STRENGTHS & LIMITATIONS

- This scoping review outlines a novel approach to obtaining consent for enrollment in randomized control trials.

- We systemically summarized the literature using broad inclusion criteria which did not restrict the type of publications included in this scoping review.
- This review is limited by there being little literature available on this topic.
- Given the heterogeneity of study types included in our analysis, there is inherent risk of bias.

For peer review only

## INTRODUCTION

Informed consent, in which a patient agrees to participate in research after having received a thorough explanation of the potential risks and benefits, is a fundamental component of modern clinical research. Emergency research presents unique challenges to obtaining informed consent because decision-making needs to happen quickly, patients may be incapacitated, and patients and their family members may be severely distressed.<sup>1-3</sup> These challenges have been increasingly recognized in the design of trials for emergency neurological conditions such as acute ischemic stroke and intracerebral hemorrhage, where patients are almost universally incapable of providing consent and enrollment decisions need to happen on a scale of minutes.<sup>4,5</sup> Several methods have been employed to try to address the challenge of informed consent in research with incapacitated patients under emergency circumstances. In some instances, patients may be enrolled into randomized controlled trials (RCTs) with consent from a substitute decision maker (SDM).<sup>6</sup> Other potential methods of enrollment include waiver of consent and deferral of consent, where a patient is enrolled into a study immediately and efforts are made to obtain consent after the fact – either from the patient or from an SDM.<sup>7-9</sup> Availability and acceptability of approaches to consent may vary depending on legal or cultural factors.<sup>6,10,11</sup>

Advance consent for enrollment in RCTs for emergency conditions is a potential method to overcome the challenges of obtaining informed consent. Advance consent for research occurs when a potential participant provides consent for future involvement in a study, contingent on qualifying for the study's inclusion criteria at a later date, for example when the participant no longer has capacity.<sup>12,13</sup> Advance consent may be specific to a particular trial, may detail a patient's wishes concerning participation in specific types of studies, or may be a reflection of values to guide researchers about the patient's desire to participate in research. American and Canadian guidelines specifically allow for advanced consent; the Canadian TCPS2 statement explicitly requires researchers and authorized parties to "be guided by these directives".<sup>14</sup> Historically, advance consent has mainly been used for research in predictably progressive diseases, such as Alzheimer's dementia.<sup>15-18</sup> Though advance consent may appear challenging to apply to emergency conditions given their unpredictable nature, it may be possible to identify patients at risk of suffering from specific emergency conditions based on the presence of recognized risk factors. For example, patients seen in a cardiology clinic with coronary artery

1  
2  
3 disease who are at risk of developing acute coronary syndrome, patients seen in a stroke  
4 prevention clinic who are at risk of suffering an acute ischemic stroke or patients with epilepsy  
5 seen in a general neurology clinic who are at risk of presenting with status epilepticus. Inviting  
6 them to provide advance consent for research could alleviate many limitations of current consent  
7 practices for emergency research.  
8  
9  
10  
11  
12

13 With these issues in mind, we aimed to review the existing literature on the use of advance  
14 consent for enrollment in RCTs for emergency conditions, and to secondarily describe the use of  
15 advance consent specifically for emergency neurological conditions.  
16  
17  
18  
19

## 20 **METHODS AND ANALYSIS**

21 We conducted a scoping review to search the literature for experiences with advance consent for  
22 participation in RCTs for emergency conditions.<sup>19</sup> A detailed protocol of the study design and  
23 methods was developed, and published a priori.<sup>19</sup> This scoping review was designed in  
24 accordance with the PRISMA-Extension for Scoping Reviews guidelines.<sup>20</sup> It was conducted  
25 using the framework of Arksey and O'Malley, and further defined by Levac.<sup>21, 22</sup>  
26  
27  
28  
29  
30  
31

### 32 **Information sources and search strategy**

33 We performed a search of Medline, Embase (Embase Classic + Embase), Cochrane Central  
34 Register of Controlled Trials and Web of Science from inception to February 10, 2020. We  
35 developed a structured search strategy in consultation with a health science librarian. Controlled  
36 vocabulary and relevant key terms were used. Reference lists of included studies were reviewed  
37 for potential inclusion. The full search strategies are outlined in Supplementary Table 1.  
38  
39  
40  
41  
42  
43  
44  
45

### 46 **Eligibility criteria and study selection**

47 Research articles were selected for inclusion if they discussed, in any manner, the use of advance  
48 consent for participation in RCTs on emergency conditions and/or treatments. An emergency  
49 condition was defined as one that required the initiation of investigations or treatment quickly,  
50 including in severely ill hospitalized patients and in the emergency department. We included  
51  
52  
53  
54  
55  
56  
57  
58  
59  
60

articles with adult patients 18 year or older, published in English. Articles were not restricted based on study design. Studies focusing on advance care planning in areas other than research, or for research into non-emergency conditions, and those exclusively discussing other variations on informed consent, were excluded. Abstracts and letters to the editor were additionally excluded (Table 1).

**Table 1.** Inclusion and exclusion criteria

| Criteria                 | Inclusion                                                                                              | Exclusion                                                                                                                                                                                                    |
|--------------------------|--------------------------------------------------------------------------------------------------------|--------------------------------------------------------------------------------------------------------------------------------------------------------------------------------------------------------------|
| <b>Language</b>          | English                                                                                                | Any other language                                                                                                                                                                                           |
| <b>Type of article</b>   | RCTs, observational studies, systematic reviews, narrative reviews, surveys, interviews, ethics papers | Letters to the editor, abstracts                                                                                                                                                                             |
| <b>Age</b>               | 18 years or older                                                                                      | Younger than 18 years old                                                                                                                                                                                    |
| <b>Population</b>        | Emergency conditions and/or treatment                                                                  | (a) Non-emergency conditions, such as dementia, and non-emergent treatment<br>(b) Pregnancy                                                                                                                  |
| <b>Topic of interest</b> | Advance consent for participation in RCTs                                                              | (a) Other forms of consent such as deferred consent or waiver of consent<br>(b) Advance care planning in areas other than research such as medical care, treatment, and advance consent for end-of-life care |

We used Covidence (Covidence, Melbourne) to screen citations for inclusion at the title, abstract and full-text level.<sup>23</sup> Citations were screened independently by at least two trained reviewers (NN, RL). Reviewers met to resolve discrepancies after 25% of the title and abstract citations had been screened. Citations advanced to the next step of review after agreement between the two independent reviewers. Conflicts were resolved by consensus or a third-party independent reviewer (NN, RL). Reference lists of included full-text articles were reviewed for further relevant publications.

### Data extraction and charting

We retrieved the full texts of included studies, and the data were extracted by two independent reviewers (NN, RL) onto a standardized data charting form (Supplementary Table 2). Conflicts

1  
2  
3 were resolved by consensus. Descriptive data were extracted on the article and author including  
4 the journal title, year of publication, type of author (MD, PhD, other), and publication country of  
5 origin. Data on the paper characteristics, methodology, medical condition of interest, and method  
6 of employing advance consent for research was also obtained. Specifically, we extracted the type  
7 of research paper, the medical condition of focus, whether the medical condition was  
8 neurological, the author's position on the use of advance consent for research, and any  
9 statements explaining how advance consent was used or discussed in the paper. If the paper was  
10 a clinical study, we recorded whether advance consent was used to enroll participants.  
11  
12  
13  
14  
15  
16  
17

### 18 **Analysis**

19  
20  
21  
22 Given the anticipated heterogeneity of study methodology and expected varying use of advance  
23 consent in eligible studies, we performed a narrative review with descriptive analysis. Data were  
24 synthesized with thematic grouping. Quantitative analysis was not planned.  
25  
26  
27  
28

### 29 **Patient and public involvement**

30  
31 Patients and the public were not directly involved in the design or dissemination plan of this  
32 research project.  
33  
34  
35

## 36 **RESULTS**

### 37 **Search results**

38  
39  
40  
41  
42 Our electronic database searches yielded 1,532 studies. With duplicates removed, 1,039 titles and  
43 abstracts were screened, and 29 full-text articles were reviewed. No additional publications were  
44 including after reviewing the reference lists. Six articles met inclusion criteria (Figure 1).  
45  
46  
47  
48  
49

### 50 **Article characteristics**

51  
52  
53 The six articles were published from 1995 to 2019. All of the articles were from the United  
54 States. They were heterogeneous in their methodologies, medical conditions studied, and  
55  
56  
57  
58  
59  
60

1  
2  
3 methods of using, evaluating or describing advance consent for research. Two of the articles  
4 were commentaries,<sup>24, 25</sup> one was a consensus statement,<sup>26</sup> one consisted of semi-structured  
5 interviews,<sup>27</sup> one was a historical review,<sup>28</sup> and one was a cohort study.<sup>29</sup> Specific conditions  
6 addressed included acute psychiatric illnesses (n = 2),<sup>24, 29</sup> pneumonia (n = 1)<sup>27</sup> and stroke (n =  
7 1).<sup>25</sup> Two articles did not mention specific conditions,<sup>26, 28</sup> but rather addressed emergency  
8 conditions in general. Three articles discussed the theoretical use of research advance directives  
9 in emergency conditions.<sup>24, 26, 28</sup> One article used semi-structured interviews to determine  
10 stakeholders' perceptions of the use of advance consent for enrollment in an RCT for the  
11 treatment of pneumonia.<sup>27</sup> One article described a method for patients to document their  
12 preferences for participation in future research as part of a broader approach to advance directive  
13 for stroke patients, but did not elaborate on advance consent specifically.<sup>25</sup> Only one study  
14 reported using advance consent to enroll participants into a clinical trial (Table 2).<sup>29</sup>

15  
16  
17  
18  
19  
20  
21  
22  
23  
24  
25  
26 **Table 2.** Characteristics of included articles.

| Author           | Year | Country       | No.  | Type of article     | Condition                                               | Description of use of advance consent                                                                                                                                                                                                               |
|------------------|------|---------------|------|---------------------|---------------------------------------------------------|-----------------------------------------------------------------------------------------------------------------------------------------------------------------------------------------------------------------------------------------------------|
| Backlar          | 1999 | United States | 369  | Commentary          | Psychiatric - Schizophrenia                             | Author discusses the theoretical use of research advance directives                                                                                                                                                                                 |
| Biros et al.     | 1995 | United States | 303  | Consensus statement | No specific condition mentioned: "Emergency conditions" | Authors discuss the theoretical use of research advance directives in the context of federal regulations in the United States.                                                                                                                      |
| Cole et al.      | 2019 | United States | 1165 | Cohort              | Psychiatric - Agitation                                 | Authors employ the use advance consent for enrollment in an RCT. Observational cohort study of patients screened and consented in advance for potential future enrollment in a randomized trial examining treatments for acute agitation in the ED. |
| Corneli et al.   | 2018 | United States | 1095 | Interview           | Respiratory - Pneumonia                                 | Authors interview stakeholders to determine the perceived acceptability of the use advance consent for enrollment in a theoretical RCT.                                                                                                             |
| Karlawish et al. | 1997 | United States | 340  | Historical review   | No specific conditioned mentioned: "Emergency medicine" | Authors explain research advance directives and discuss the ethics and regulations in the United States concerning the use of advance consent for                                                                                                   |



|                        |      |               |     |            |                              |                                                                                                                                                                                                                                     |
|------------------------|------|---------------|-----|------------|------------------------------|-------------------------------------------------------------------------------------------------------------------------------------------------------------------------------------------------------------------------------------|
|                        |      |               |     |            |                              | research on emergency conditions.                                                                                                                                                                                                   |
| <b>McGehrin et al.</b> | 2018 | United States | 811 | Commentary | Neurologic - Ischemic stroke | Authors outline the use of a standardized document which allows patients to record their preferences regarding acute stroke treatment interventions, as well as for preferences for participation in future stroke clinical trials. |

### Arguments for and against the use of advance consent for research

Three articles expressed opinions in favour of using advance consent for research,<sup>24, 25, 27</sup> two were critical of its use,<sup>26, 29</sup> and one did not mention an opinion (Table 3).<sup>28</sup> The arguments in favour of advance consent were: that it is acceptable to patients (Corneli *et al.*) and that it enhances patient autonomy (Backlar, McGehrin *et al.*).<sup>24, 25, 27</sup> The arguments against advance consent were that it was not feasible (Cole *et al.*, Biros *et al.*), that participants would not be adequately informed (Biros *et al.*) and that it would not protect patients from the risks of participation in RCTs (Biros *et al.*).<sup>26, 29</sup> One article did not mention an opinion regarding the use of advance consent for research, and instead defined research advance directives, discussed the ethical considerations, and outlined the current regulations in the United States (Karlavish *et al.*).<sup>28</sup>

**Table 3.** Author's disposition on the use of advance consent for research

| Author       | Author's disposition                                    | Description of supporting evidence                                                                                                                                                                                                                                                                                                                                                                                                                                                                                                                    |
|--------------|---------------------------------------------------------|-------------------------------------------------------------------------------------------------------------------------------------------------------------------------------------------------------------------------------------------------------------------------------------------------------------------------------------------------------------------------------------------------------------------------------------------------------------------------------------------------------------------------------------------------------|
| Backlar      | <i>In favour</i> of use of advance consent for research | The author reasons that "substantive and procedural research advance directives allow potential subjects to make a choices of their own as to whether they wish to be enrolled and participate in a research protocol, to appoint a surrogate decision maker of their own choosing, and to additionally spell out specific safeguards"; and that "research advance directives provide potential subjects with the opportunity not only to make choices of their own but provide a mechanism that guarantees them a cluster of important protections." |
| Biros et al. | <i>Against</i> use of advance consent for research      | The authors contend that "patients may not consider consent carefully when the changes of entry into a specific study are remote. Thus, they may not be adequately protected from research risks".<br>Regarding advanced consent at hospital admission for a potential future research protocol, the authors argue that pre-consent "cannot be used for emergency research in the prehospital setting or for studying the treatment of acute illnesses that occur in the out-of-hospital setting".                                                    |

|                  |                                                                          |                                                                                                                                                                                                                                                                                                                                                                                                                                                                                                                                                                                                                                                                         |
|------------------|--------------------------------------------------------------------------|-------------------------------------------------------------------------------------------------------------------------------------------------------------------------------------------------------------------------------------------------------------------------------------------------------------------------------------------------------------------------------------------------------------------------------------------------------------------------------------------------------------------------------------------------------------------------------------------------------------------------------------------------------------------------|
|                  |                                                                          | Regarding obtaining advanced consent from unaffected subjects who may require emergency care in the future, the authors argue that “identifying those patients who have previously consented may not be feasible when the critical situation occurs”.                                                                                                                                                                                                                                                                                                                                                                                                                   |
| Cole et al.      | <i>Against</i> use of advance consent for research                       | The authors screened 1,461 patients for their RCT on loxapine versus IM haloperidol + lorazepam for treatment of acute agitation in the ED secondary to bipolar disorder type 1 or schizophrenia. “Despite screening >1,400 patients and obtaining preconsent in 43 patients”, not a single patient was enrolled using preconsent methods. Only 2 patients were enrolled into the study, and the study was terminated 1 month after enrollment of the first patient due to loss of funding. The article concludes that the utilization of preconsent in their study was “found to be infeasible”.                                                                       |
| Corneli et al.   | <i>In favour</i> of use of advance consent for research                  | Structured interviews detail that “patients and caregivers expressed no concerns about being approached in the ICU about a clinical trial on treatment for pneumonia before the patient was diagnosed with the condition”, and that “the IRB representatives expressed no ethical or regulatory concerns with the early enrollment strategy using advance consent”.<br>The article concludes that “early enrollment strategy with advance consent appears to be an acceptable approach among key stakeholders”.                                                                                                                                                         |
| Karlawish et al. | <i>No opinion</i> for or against the use of advance consent for research | The authors outline that “advance informed consent means, that at a time before enrollment, an investigator seeks the consent of a competent person who is a potential subject of a research trial.[...] Like advance directives for clinical care such as living wills, regulations could endorse advance directives for research.” They then explain that “a moral conflict can occur when an advance directive conflicts with substituted judgment or best interests principles and that “there are the practical limits, including that an advance directive cannot address every circumstance a potential subject faces and that many people do not execute them”. |
| McGehrin et al.  | <i>In favour</i> of use of advance consent for research                  | The article states that “one solution to preserving patient autonomy in acute stroke care is the advent of a stroke advance directive. An advance directive for acute stroke therapy was created at the University of California, San Diego (UCSD) in 2015 titled COAST (Coordinating Options for Acute Stroke Therapy). This 4-page form allows patients to document their preferences regarding acute stroke treatment interventions, as well as participation in clinical stroke trials, in a nonurgent setting and in advance of a potential stroke.”                                                                                                               |

## Experiences with advance consent

Corneli *et al* was the only study to report the results of empirical research, in that they conducted semi-structured interviews with 52 stakeholders including patients, caregivers, institutional review board representatives, clinical investigators and study coordinators about advance consent.<sup>27</sup> Stakeholders, including patients and caregivers, reported no concerns about being approached in advance regarding participation in a research study prior to developing the condition required for in enrollment – in this case, pneumonia. The authors therefore concluded that an early enrollment strategy with advance consent would be acceptable.

1  
2  
3 Cole *et al* presented the sole experience using advance consent for study enrollment.<sup>29</sup> The  
4 authors conducted an observational cohort study of psychiatric participants pre-consented for an  
5 RCT examining treatments for acute agitation in the Emergency department (ED). Eligible  
6 participants provided informed consent for enrolment in the RCT, which involved having a drug  
7 administered for agitation, in the event that they would present to the ED within the next 3 years  
8 with acute agitation. Potential participants could also be consented for the trial in real time, if  
9 they retained capacity to provide informed consent or if a legally authorized representative was  
10 present to provide consent. Over 1000 patients were screened for the study, and only 75 were  
11 found to be eligible to provide advance consent, 43 of whom did provide advance consent. No  
12 participant was enrolled into the study via advance consent, and only two participants were  
13 successfully enrolled into the trial by other methods of consent. The trial was terminated early, 1  
14 month after enrolling its first patient, due to loss of funding. Given that no participant was  
15 enrolled by advance consent, the authors concluded that it was not a feasible approach to study  
16 enrollment.  
17  
18  
19  
20  
21  
22  
23  
24  
25  
26  
27  
28

### 29 **Advance consent and emergency neurologic conditions**

30  
31  
32 The article by McGehrin *et al.* was the only paper that specifically focused on neurologic  
33 conditions. McGehrin *et al* proposed a 4-page advance directive document they call  
34 ‘Coordinating Options for Acute Stroke Therapy (COAST)’, which is designed to allow patients  
35 to document their preferences regarding acute stroke treatment, including participation in future  
36 clinical stroke trials.<sup>25</sup> The article did not describe what information would be recorded regarding  
37 preferences for involvement in future stroke trials, nor did it detail how this information would  
38 be utilized for future enrolment in research studies.  
39  
40  
41  
42  
43  
44  
45

### 46 **DISCUSSION**

47  
48 Our scoping review maps the existing literature on the use of advance consent for enrolling  
49 participants into RCTs for emergency conditions. The results of our review demonstrate that  
50 there has been minimal exploration of the use of advance consent for enrollment in RCTs for  
51 emergency conditions. We could only identify one study that had attempted the use of advance  
52 consent in an adult population,<sup>29</sup> and one study in which opinions about advance consent were  
53  
54  
55  
56  
57  
58  
59  
60

1  
2  
3 elicited.<sup>27</sup> No studies had endeavoured to use advance consent for enrollment into research in  
4 emergency neurological conditions.  
5  
6  
7

8 The limited literature on the use of advance consent may suggest that there are concerns  
9 surrounding feasibility, but we believe the issues raised by Cole *et al.* and Biros *et al.* are  
10 potentially remediable.<sup>26, 29</sup> For example, selecting conditions for which a clearly defined at-risk  
11 population exists, such as acute ischemic stroke, would likely enhance feasibility. A recent  
12 assessment of local data at a tertiary care centre in Ottawa (Ontario, Canada) also supports the  
13 feasibility of advance consent in selected at-risk populations, in this case neurologic  
14 emergencies. The data established that 5–7% of patients seen in the stroke prevention clinic with  
15 minor stroke or transient ischaemic attack presented to the emergency department with an acute  
16 stroke within 1 year of their clinic appointment. This data reflects a potential 100–150 candidates  
17 annually who could be consented in clinic using advance consent methods for RCTs pertaining  
18 to acute ischemic strokes in the emergency department. (“Advance consent for acute stroke  
19 trials”, *The Lancet Neurology*, 2021). Moreover, an electronic medical record could be used to  
20 document decisions about advance consent in such a way that it is obvious upon presentation to  
21 the emergency department. Because the study by Cole *et al.* failed to enroll a patient using  
22 advance consent, they conclude that the approach is not feasible; we believe it is important to  
23 note that they struggled to enroll patients into their study by any means and that this is unlikely  
24 owing simply to the use of advance consent. Biros *et al.* raise an important concern about  
25 patients being unable to consider consent carefully when potential enrollment is remote.  
26 However, Corneli *et al.* directly addressed this issue in their survey and found that nearly all  
27 patient and caregiver respondents were not concerned about a patient’s ability to understand  
28 consent information for a potential future trial.  
29  
30  
31  
32  
33  
34  
35  
36  
37  
38  
39  
40  
41  
42  
43  
44  
45

46 Given the little experience with advance consent we were able to identify in this scoping review,  
47 many details regarding the practical application of advance consent could not be developed in  
48 detail through our search. First, should advance consent be tied to a particular trial protocol only,  
49 or should be it be more general and applicable to any available research trial for which a patient  
50 may be eligible? While the concept of general or "broad" consent is known in clinical research, it  
51 has tended to be used in relation to the future study of tissue samples. It remains to be seen  
52  
53  
54  
55  
56  
57  
58  
59  
60

1  
2  
3 whether physicians, participants, and regulators will feel comfortable with general advance  
4 consent (for example, a patient who consents to participate in any acute stroke trial) as a stand-in  
5 for specific informed consent (for example, a specific stroke trial). Second, how would advance  
6 consent from an incapable patient be prioritized if that patient's substitute decision-maker objects  
7 to trial participation? We would expect that a legal, signed, informed consent document from an  
8 incapable patient would be considered valid in most legal jurisdictions, even if a legally  
9 authorized representative is available. Such an eventuality could in fact be written into an  
10 advance consent document. Importantly, it must also be noted that a patient has the right to  
11 decline participation in advance, and that such an advance decision should also be respected in  
12 the event that they are eligible for participation in a trial. Ultimately, practice regarding some of  
13 these issues will be determined by individual jurisdictions' legal standards, which vary quite  
14 significantly from country to country, and sometimes even within countries.

15  
16  
17  
18  
19  
20  
21  
22  
23  
24  
25  
26 The strengths of our review are that we prospectively registered our study, utilized a thorough  
27 protocol, and systematically searched, screened and summarized the literature on advance  
28 consent for research in acute care RCTs. We also employed broad inclusion criteria which did  
29 not restrict the type of included publications in our review. This ensured that we were able to  
30 survey all of the available literature on our topic of interest. Our study was not without  
31 limitations. Despite our comprehensive search strategy, there was little literature on this topic,  
32 and due to the heterogeneity of study types ultimately included in our analysis, there is inherent  
33 risk of bias. Because we conducted a scoping review, we did not perform a specific risk of bias  
34 assessment of each individual manuscript identified and data synthesis was not performed.

35  
36  
37  
38  
39  
40  
41  
42  
43 Ultimately, we suspect that advance consent could offer several important advantages over  
44 existing trial recruitment methods. Most importantly, advance consent could create a more  
45 ethical system for trial enrollment by ensuring that patients' wishes to be enrolled or not enrolled  
46 into trials are respected even if they cannot express them at the time of a medical emergency.  
47 Advance consent could reduce the time required to enroll willing patients into trials of time-  
48 sensitive treatments, potentially leading to better individual outcomes. It could render research  
49 findings more generalizable by removing biases against more severely affected patients or non-  
50 accompanied patients. It could even allow RCTs to be completed more quickly, as enrollment  
51  
52  
53  
54  
55  
56  
57  
58  
59  
60

1  
2  
3 rates may be enhanced leading to the more rapid determination of research results. Future studies  
4 could aim to assess the acceptability of advance consent to potential participants, along with the  
5 feasibility of enrolling potential research participants using this method of consent.  
6  
7  
8  
9

10 In summary, our scoping review demonstrates that there has been minimal exploration on the use  
11 of advanced consent for enrollment in RCTs for emergency conditions, and significant gaps in  
12 the literature remain. Furthermore, there have been no studies assessing the use of advance  
13 consent for enrollment in RCTs involving neurologic emergencies. Patients and caregivers appear  
14 open to participate in advance consent for emergency conditions.  
15  
16  
17  
18  
19  
20  
21  
22  
23  
24  
25  
26  
27  
28  
29  
30  
31  
32  
33  
34  
35  
36  
37  
38  
39  
40  
41  
42  
43  
44  
45  
46  
47  
48  
49  
50  
51  
52  
53  
54  
55  
56  
57  
58  
59  
60

## DECLARATIONS

### **Ethics approval and consent to participate**

Not applicable.

### **Availability of data and materials**

Data sharing is not applicable to this article as no datasets were generated or analysed during the current study.

### **Competing interests**

The authors declare that they have no competing interests.

### **Funding**

This research received no specific grant from any funding agency in the public, commercial, or not-for-profit sectors.

JP is supported by a Mid-Career Award from the Heart and Stroke Foundation of Ontario.

### **Author contributions**

All authors made substantial contributions to the manuscript.

NN/BD/JP/DD/MS designed the research question, NN/BD/MS designed the eligibility criteria, BD/DD/MS designed the search strategy, NN/BD/MS designed the screening strategy, NN/RL/BD/MS came up with the data extraction items and NN/RL/BD/MS developed the data synthesis strategy. All authors contributed to analysis, drafting, editing and provided final approval.

### **Acknowledgements**

No acknowledgements.

**REFERENCES**

1. Dickert NW, Brown J, Cairns CB, et al. Confronting Ethical and Regulatory Challenges of Emergency Care Research With Conscious Patients. *Ann Emerg Med*. Apr 2016;67(4):538-45. doi:10.1016/j.annemergmed.2015.10.026
2. Mangset M, Forde R, Nessa J, Berge E, Wyller TB. I don't like that, it's tricking people too much...: acute informed consent to participation in a trial of thrombolysis for stroke. *J Med Ethics*. Oct 2008;34(10):751-6. doi:10.1136/jme.2007.023168
3. Wendler D, Dickert NW, Silbergleit R, Kim SY, Brown J. Targeted Consent for Research on Standard of Care Interventions in the Emergency Setting. *Crit Care Med*. Jan 2017;45(1):e105-e110. doi:10.1097/CCM.0000000000002023
4. Goyal M, Demchuk AM, Menon BK, et al. Randomized assessment of rapid endovascular treatment of ischemic stroke. *N Engl J Med*. Mar 12 2015;372(11):1019-30. doi:10.1056/NEJMoa1414905
5. Shamy MCF, Dewar B, Chevrier S, et al. Deferral of Consent in Acute Stroke Trials. *Stroke*. Apr 2019;50(4):1017-1020. doi:10.1161/STROKEAHA.118.024096
6. Burns KE, Zubrinich C, Marshall J, Cook D. The 'Consent to Research' paradigm in critical care: challenges and potential solutions. *Intensive Care Med*. Oct 2009;35(10):1655-8. doi:10.1007/s00134-009-1562-9
7. 61 21 CFR Part 50. Protection of Human Subjects: informed consent and waiver of consent requirements in certain emergency research; Final rules. Food and Drug Administration; Federal Register. 51498–52332 (October 2, 1996).
8. World Medical Association. The Declaration of Helsinki: ethical principles for medical research involving human subjects. 2008. <https://www.wma.net/policies-post/wma-declaration-of-helsinki-ethical-principles-for-medical-research-involving-human-subjects/>
9. Beauchamp TL, Fost N, Robertson JA. The ambiguities of 'deferred consent'. *IRB*. Aug-Sep 1980;2(7):6-9.
10. van Belle G, Mentzelopoulos SD, Aufderheide T, May S, Nichol G. International variation in policies and practices related to informed consent in acute cardiovascular research: Results from a 44 country survey. *Resuscitation*. Jun 2015;91:76-83. doi:10.1016/j.resuscitation.2014.11.029
11. Bravo G, Dubois MF, Wildeman SM, et al. Research with decisionally incapacitated older adults: practices of Canadian research ethics boards. *IRB*. Nov-Dec 2010;32(6):1-8.
12. Largent EA, Wendler D, Emanuel E, Miller FG. Is emergency research without initial consent justified?: the consent substitute model. *Arch Intern Med*. Apr 26 2010;170(8):668-74. doi:10.1001/archinternmed.2010.80



13. Saks ER, Dunn LB, Wimer J, Gonzales M, Kim S. Proxy consent to research: the legal landscape. *Yale J Health Policy Law Ethics*. Winter 2008;8(1):37-92.
14. Government of Canada. Tri-council policy statement on ethical conduct for research involving human. Section 3.11. February 5, 2016. Accessed March 15, 2020. <http://www.pre.ethics.gc.ca/eng/policy-politique/initiatives/tcps2-eptc2/Default/>
15. Sachs GA. Advance consent for dementia research. *Alzheimer Dis Assoc Disord*. 1994;8(Suppl. 4):19-27.
16. Buller T. Advance consent, critical interests and dementia research. *J Med Ethics*. Aug 2015;41(8):701-7. doi:10.1136/medethics-2014-102024
17. Stocking CB, Hougham GW, Danner DD, Patterson MB, Whitehouse PJ, Sachs GA. Speaking of research advance directives: planning for future research participation. *Neurology*. May 9 2006;66(9):1361-6. doi:10.1212/01.wnl.0000216424.66098.55
18. Pierce R. A changing landscape for advance directives in dementia research. *Soc Sci Med*. Feb 2010;70(4):623-30. doi:10.1016/j.socscimed.2009.10.037
19. Niznick N, Lun R, Dewar B, Dowlatshahi D, Shamy M. Advanced consent for participation in acute care randomised control trials: protocol for a scoping review. *BMJ Open*. Oct 16 2020;10(10):e039172. doi:10.1136/bmjopen-2020-039172
20. Tricco AC, Lillie E, Zarin W, et al. PRISMA Extension for Scoping Reviews (PRISMA-ScR): Checklist and Explanation. *Ann Intern Med*. Oct 2 2018;169(7):467-473. doi:10.7326/M18-0850
21. Arksey HOM, L. Scoping studies: towards a methodological framework. *International Journal of Social Research Methodology*. 2005;8(1):19-32.
22. Levac D, Colquhoun H, O'Brien KK. Scoping studies: advancing the methodology. *Implement Sci*. Sep 20 2010;5:69. doi:10.1186/1748-5908-5-69
23. Covidence systematic review software, Veritas Health Innovation, Melbourne, Australia. Available at [www.covidence.org](http://www.covidence.org).
24. Backlar P. A choice of one's own research advance directives: anticipatory planning for research subjects with fluctuating or prospective decisionmaking impairments. *Account Res*. 1999;7(2-4):117-28. doi:10.1080/08989629908573946
25. McGehrin K, Spokoyny I, Meyer BC, Agrawal K. The COAST stroke advance directive: A novel approach to preserving patient autonomy. *Neurol Clin Pract*. Dec 2018;8(6):521-526. doi:10.1212/CPJ.0000000000000549
26. Biros MH, Lewis RJ, Olson CM, Runge JW, Cummins RO, Fost N. Informed consent in emergency research. Consensus statement from the Coalition Conference of Acute Resuscitation

1  
2  
3 and Critical Care Researchers. *JAMA*. Apr 26 1995;273(16):1283-7.  
4 doi:10.1001/jama.273.16.1283  
5

6  
7 27. Corneli A, Perry B, Collyar D, et al. Assessment of the Perceived Acceptability of an  
8 Early Enrollment Strategy Using Advance Consent in Health Care-Associated Pneumonia.  
9 *JAMA Netw Open*. Dec 7 2018;1(8):e185816. doi:10.1001/jamanetworkopen.2018.5816  
10

11 28. Karlawish JH, Sachs GA. Research on the cognitively impaired: lessons and warnings  
12 from the emergency research debate. *J Am Geriatr Soc*. Apr 1997;45(4):474-81.  
13 doi:10.1111/j.1532-5415.1997.tb05174.x  
14

15 29. Cole JB, Klein LR, Mullinax SZ, Nordstrom KD, Driver BE, Wilson MP. Study  
16 Enrollment When "Preconsent" Is Utilized for a Randomized Clinical Trial of Two Treatments  
17 for Acute Agitation in the Emergency Department. *Acad Emerg Med*. May 2019;26(5):559-566.  
18 doi:10.1111/acem.13673  
19  
20  
21  
22  
23  
24  
25  
26  
27  
28  
29  
30  
31  
32  
33  
34  
35  
36  
37  
38  
39  
40  
41  
42  
43  
44  
45  
46  
47  
48  
49  
50  
51  
52  
53  
54  
55  
56  
57  
58  
59  
60

1  
2  
3 **Figure Legend**  
4  
5

6 Figure 1: Preferred reporting items for Systematic Reviews and Meta Analyses Flow Diagram  
7  
8  
9  
10  
11  
12  
13  
14  
15  
16  
17  
18  
19  
20  
21  
22  
23  
24  
25  
26  
27  
28  
29  
30  
31  
32  
33  
34  
35  
36  
37  
38  
39  
40  
41  
42  
43  
44  
45  
46  
47  
48  
49  
50  
51  
52  
53  
54  
55  
56  
57  
58  
59  
60

For peer review only

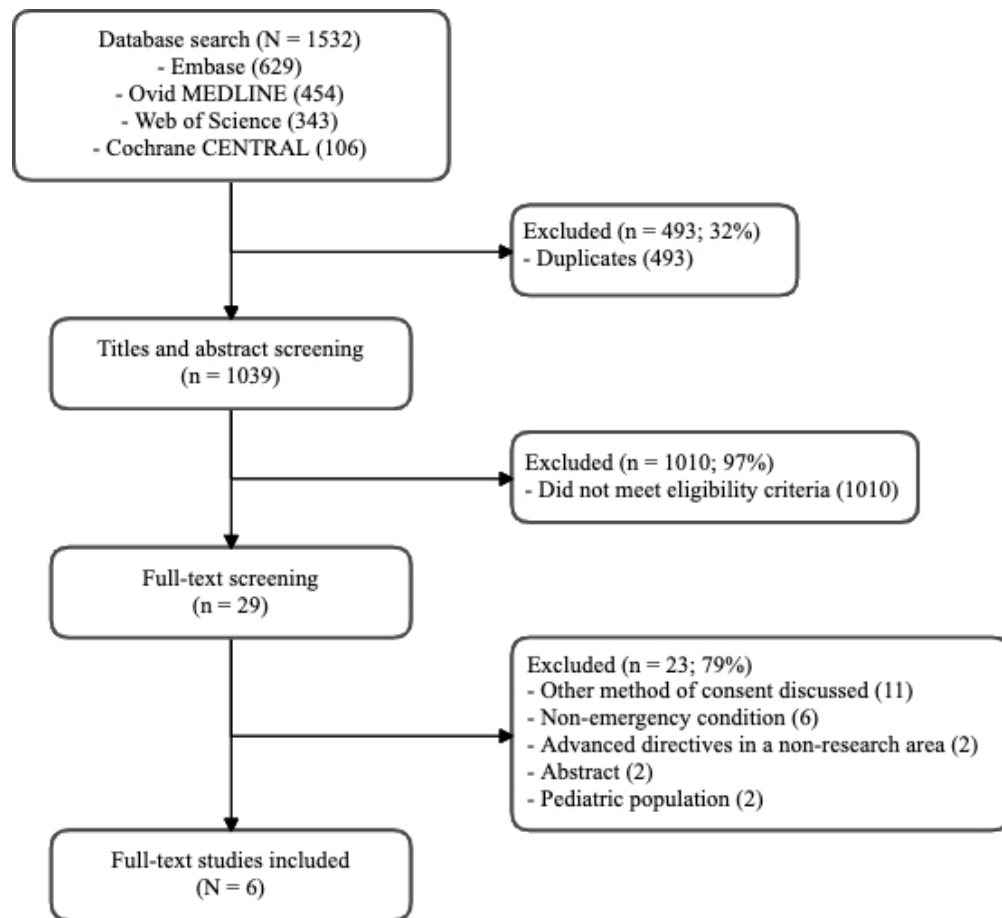

Figure 1: Preferred reporting items for Systematic Reviews and Meta Analyses Flow Diagram

195x178mm (72 x 72 DPI)

**SUPPLEMENTARY MATERIAL****Supplementary Material Legend**

Supplementary Table 1: Search strategies

Supplementary Table 2: Data charting form

For peer review only

**Supplementary Table 1. Search strategy**

| Database                                                      | Search terms                                                                                          | Results    |
|---------------------------------------------------------------|-------------------------------------------------------------------------------------------------------|------------|
| <b>Embase Classic + Embase<br/>(1947 – February 10, 2020)</b> | 1. ((advance* or prior or prospective*) adj3 consent).tw.                                             | 2844       |
|                                                               | 2. (preconsent or pre-consent).tw.                                                                    | 43         |
|                                                               | 3. Advance Directives/ and Informed Consent/                                                          | 1361       |
|                                                               | 4. 1 or 2 or 3                                                                                        | 4206       |
|                                                               | 5. incapacitated.tw.                                                                                  | 1984       |
|                                                               | 6. *heart infarction/                                                                                 | 112881     |
|                                                               | 7. (cardiac arrest or heart arrest or heart attack or asystole or cardiopulmonary arrest*).tw.        | 67289      |
|                                                               | 8. (myocardial infarct* or myocardial isch*).tw.                                                      | 318778     |
|                                                               | 9. (cardiac death or heart death or arrhythmic death).tw.                                             | 41772      |
|                                                               | 10. *dementia/                                                                                        | 54639      |
|                                                               | 11. (dementia or alzheimer*).tw.                                                                      | 292062     |
|                                                               | 12. *cerebrovascular accident/                                                                        | 78550      |
|                                                               | 13. (stroke or intracerebral h?emorrhage).tw.                                                         | 385677     |
|                                                               | 14. *brain hemorrhage/                                                                                | 33439      |
|                                                               | 15. *epileptic state/                                                                                 | 10938      |
|                                                               | 16. (epilepsy or status epilepticus).tw.                                                              | 165346     |
|                                                               | 17. *subarachnoid hemorrhage/                                                                         | 21563      |
|                                                               | 18. subarachnoid h?emorrhage.tw.                                                                      | 32523      |
|                                                               | 19. exp *injury/                                                                                      | 1111912    |
|                                                               | 20. ((neurolog* or brain) adj3 (emergenc* or injur* or trauma*)).tw. (                                | 114863     |
|                                                               | 21. emergency care/                                                                                   | 44041      |
|                                                               | 22. (emergency department* or emergency treatment* or emergency setting* or emergency situation*).tw. | 149499     |
|                                                               | 23. emergency treatment/                                                                              | 17365      |
|                                                               | 24. emergenc*.ti.                                                                                     | 142870     |
|                                                               | 25. *human experiment/                                                                                | 5564       |
|                                                               | 26. *"clinical trial (topic)"/                                                                        | 10702      |
|                                                               | 27. *emergency medicine/                                                                              | 27031      |
|                                                               | 28. *emergency ward/                                                                                  | 30666      |
|                                                               | 29. *clinical research/ or *medical research/                                                         | 83362      |
|                                                               | 30. or/5-29                                                                                           | 2684505    |
|                                                               | 31. 4 and 30                                                                                          | <b>629</b> |
| <b>Ovid MEDLINE(R) ALL<br/>(1946 – February 10, 2020)</b>     | 1. ((advance* or prior or prospective*) adj3 consent).tw.                                             | 1159       |
|                                                               | 2. (preconsent or pre-consent).tw,kf.                                                                 | 25         |
|                                                               | 3. Advance Directives/ and Informed Consent/                                                          | 633        |
|                                                               | 4. or/1-3                                                                                             | 1786       |
|                                                               | 5. incapacitated.tw.                                                                                  | 1254       |
|                                                               | 6. Myocardial Infarction/                                                                             | 163865     |
|                                                               | 7. (cardiac arrest or heart arrest or heart attack or asystole or cardiopulmonary arrest*).tw.        | 41358      |
|                                                               | 8. (myocardial infarct* or myocardial isch*).tw,kw.                                                   | 218769     |
|                                                               | 9. (cardiac death or heart death or arrhythmic death).tw,kw.                                          | 23707      |
|                                                               | 10. Dementia/ or (dementia or alzheimer*).tw,kf.                                                      | 220951     |
|                                                               | 11. exp Stroke/ or (stroke or intracerebral h?emorrhage).tw,kf.                                       | 279104     |
|                                                               | 12. exp Cerebral Hemorrhage/ or Status Epilepticus/                                                   | 41146      |

|                                                                                        |                                                                                                   |            |
|----------------------------------------------------------------------------------------|---------------------------------------------------------------------------------------------------|------------|
| 13.                                                                                    | (epilepsy or status epilepticus).tw,kw.                                                           | 109855     |
| 14.                                                                                    | exp Subarachnoid Hemorrhage/ or subarachnoid h?emorrhage.tw,kw.                                   | 29908      |
| 15.                                                                                    | exp "Wounds and Injuries"/                                                                        | 889722     |
| 16.                                                                                    | ((neurolog* or brain) adj3 (emergenc* or injur* or trauma*)).tw.                                  | 79721      |
| 17.                                                                                    | Emergency Service, Hospital/                                                                      | 66069      |
| 18.                                                                                    | Emergencies/ or Emergency Medicine/ or exp Emergency Treatment/ (                                 | 164845     |
| 19.                                                                                    | (emergency department* or emergency treatment* or emergency setting* or emergency situation*).tw. | 97671      |
| 20.                                                                                    | emergenc*.ti.                                                                                     | 109009     |
| 21.                                                                                    | exp Human Experimentation/                                                                        | 12414      |
| 22.                                                                                    | Clinical Trials as Topic/ or Biomedical Research/                                                 | 257452     |
| 23.                                                                                    | or/5-22                                                                                           | 2295131    |
| 24.                                                                                    | 4 and 23                                                                                          | <b>454</b> |
| <b>EBM Review – Cochrane Central Register of Controlled Trials (February 10, 2020)</b> |                                                                                                   |            |
| 1.                                                                                     | ((advance* or prior or prospective*) adj3 consent).tw.                                            | 3608       |
| 2.                                                                                     | (preconsent or pre-consent).tw.                                                                   | 15         |
| 3.                                                                                     | Advance Directives/ and Informed Consent/                                                         | 1          |
| 4.                                                                                     | or/1-3                                                                                            | 3621       |
| 5.                                                                                     | incapacitated.tw.                                                                                 | 100        |
| 6.                                                                                     | Myocardial Infarction/                                                                            | 10416      |
| 7.                                                                                     | (cardiac arrest or heart arrest or heart attack or asystole or cardiopulmonary arrest*).tw. (     | 4770       |
| 8.                                                                                     | (myocardial infarct* or myocardial isch*).tw.                                                     | 30889      |
| 9.                                                                                     | (cardiac death or heart death or arrhythmic death).tw.                                            | 3461       |
| 10.                                                                                    | Dementia/ or (dementia or alzheimer*).tw.                                                         | 18563      |
| 11.                                                                                    | exp Stroke/ or (stroke or intracerebral h?emorrhage).tw.                                          | 52260      |
| 12.                                                                                    | exp Cerebral Hemorrhage/ or Status Epilepticus/                                                   | 1030       |
| 13.                                                                                    | (epilepsy or status epilepticus).tw,kw.                                                           | 6807       |
| 14.                                                                                    | exp Subarachnoid Hemorrhage/ or subarachnoid h?emorrhage.tw,kw.                                   | 1950       |
| 15.                                                                                    | exp "Wounds and Injuries"/                                                                        | 22743      |
| 16.                                                                                    | ((neurolog* or brain) adj3 (emergenc* or injur* or trauma*)).tw.                                  | 6550       |
| 17.                                                                                    | Emergency Service, Hospital/                                                                      | 2083       |
| 18.                                                                                    | Emergencies/ or Emergency Medicine/ or exp Emergency Treatment/                                   | 6536       |
| 19.                                                                                    | (emergency department* or emergency treatment* or emergency setting* or emergency situation*).tw. | 11275      |
| 20.                                                                                    | emergenc*.ti.                                                                                     | 7206       |
| 21.                                                                                    | exp Human Experimentation/                                                                        | 133        |
| 22.                                                                                    | Clinical Trials as Topic/ or Biomedical Research/                                                 | 33365      |
| 23.                                                                                    | or/5-22                                                                                           | 180502     |
| 24.                                                                                    | 4 and 23                                                                                          | 309        |
| 25.                                                                                    | (EUCTR* or IRCT* or ISRCT* or CTRI* or JPRN* or DRKS* or CHICTR* or NCT* or ACTRN*).au.           | 300851     |
| 26.                                                                                    | 24 not 25                                                                                         | <b>106</b> |
| <b>Web of Science (February 10, 2020)</b>                                              |                                                                                                   |            |
|                                                                                        | TS=(preconsent or pre-consent)                                                                    | 33         |
|                                                                                        | TS=((advance* or prior or prospective*) NEAR/3 consent)                                           | 1870       |

|    |                                                             |            |
|----|-------------------------------------------------------------|------------|
| 1  |                                                             |            |
| 2  |                                                             |            |
| 3  | #2 OR #1                                                    | 1899       |
| 4  | TS=incapacitated                                            | 3429       |
| 5  | TS=("cardiac arrest" or "heart arrest" or "heart attack" or | 49571      |
| 6  | asystole or "cardiopulmonary arrest*")                      |            |
| 7  | TS=("myocardial infarct*" or "myocardial isch*").           | 326927     |
| 8  | TS=("cardiac death" or "heart death" or "arrhythmic death") | 31798      |
| 9  | I                                                           |            |
| 10 | TS=(dementia or alzheimer*)                                 | 319597     |
| 11 | TS=(stroke or "intracerebral h?emorrhage")                  | 345906     |
| 12 | TS=(epilepsy or "status epilepticus")                       | 149826     |
| 13 | TS="subarachnoid h?emorrhage*"                              | 3980       |
| 14 | TS=((neurolog* or brain) NEAR/3 (emergenc* or injur* or     | 118137     |
| 15 | trauma*))                                                   |            |
| 16 | TS= ("emergency department*" or "emergency treatment*" or   | 107877     |
| 17 | "emergency setting*" or "emergency situation*")             |            |
| 18 | TI=emergenc*                                                | 153160     |
| 19 | TS=clinical research                                        | 346041     |
| 20 | TS="human experiment*"                                      | 2638       |
| 21 | I                                                           |            |
| 22 | #16 OR #15 OR #14 OR #13 OR #12 OR #11 OR #10 OR #9         | 1747826    |
| 23 | OR #8 OR #7 OR #6 OR #5 OR #4                               |            |
| 24 | #17 AND #3                                                  | <b>343</b> |
| 25 |                                                             |            |
| 26 |                                                             |            |
| 27 |                                                             |            |
| 28 |                                                             |            |
| 29 |                                                             |            |
| 30 |                                                             |            |
| 31 |                                                             |            |
| 32 |                                                             |            |
| 33 |                                                             |            |
| 34 |                                                             |            |
| 35 |                                                             |            |
| 36 |                                                             |            |
| 37 |                                                             |            |
| 38 |                                                             |            |
| 39 |                                                             |            |
| 40 |                                                             |            |
| 41 |                                                             |            |
| 42 |                                                             |            |
| 43 |                                                             |            |
| 44 |                                                             |            |
| 45 |                                                             |            |
| 46 |                                                             |            |
| 47 |                                                             |            |
| 48 |                                                             |            |
| 49 |                                                             |            |
| 50 |                                                             |            |
| 51 |                                                             |            |
| 52 |                                                             |            |
| 53 |                                                             |            |
| 54 |                                                             |            |
| 55 |                                                             |            |
| 56 |                                                             |            |
| 57 |                                                             |            |
| 58 |                                                             |            |
| 59 |                                                             |            |
| 60 |                                                             |            |



Supplementary Table 2. Data charting form

| SECTION                                        | DATA ITEM                                    | EXTRACTED DATA                                                                                                                                                      |
|------------------------------------------------|----------------------------------------------|---------------------------------------------------------------------------------------------------------------------------------------------------------------------|
| <b>Study identification</b>                    |                                              |                                                                                                                                                                     |
|                                                | Paper number                                 |                                                                                                                                                                     |
|                                                | Journal - Title                              |                                                                                                                                                                     |
|                                                | Article - Title                              |                                                                                                                                                                     |
|                                                | Author last name                             |                                                                                                                                                                     |
|                                                | Type of author (MD/PhD/Other)                | MD<br>PhD<br>Other                                                                                                                                                  |
|                                                | Publication date (Year)                      |                                                                                                                                                                     |
|                                                | Country of Origin                            | Canada<br>United States<br>United Kingdom<br>Other country in North or South America<br>Other country in Europe<br>Other country in Asia<br>Other country in Africa |
| <b>Study characteristics &amp; methodology</b> |                                              |                                                                                                                                                                     |
| <i>Medical condition</i>                       | What is the condition?                       | Ischemic Stroke<br>ICH<br>Seizure<br>Cardiac<br>Respiratory<br>Psychiatric<br>None [no mentioned condition]<br>Other                                                |
|                                                | Is the condition neurological?               | Yes<br>No                                                                                                                                                           |
| <i>Paper characteristics</i>                   | Type of research paper                       | RCT<br>Cohort<br>Case-Control<br>Survey<br>Interview<br>Commentary<br>Philosophical argument<br>Historical review<br>Other                                          |
|                                                | If clinical study, was Advance consent used? | Yes<br>No<br>Not applicable                                                                                                                                         |
| <b>Results</b>                                 |                                              |                                                                                                                                                                     |
|                                                | Author disposition                           | In favour of advance consent<br>Against advance consent                                                                                                             |

1  
2  
3  
4  
5  
6  
7  
8  
9  
10  
11  
12  
13  
14  
15  
16  
17  
18  
19  
20  
21  
22  
23  
24  
25  
26  
27  
28  
29  
30  
31  
32  
33  
34  
35  
36  
37  
38  
39  
40  
41  
42  
43  
44  
45  
46  
47  
48  
49  
50  
51  
52  
53  
54  
55  
56  
57  
58  
59  
60

|  |                     |                                                                  |
|--|---------------------|------------------------------------------------------------------|
|  |                     | No opinion mentioned                                             |
|  | Specific statements | Extract any paragraph of text where advance consent is discussed |

ICH = intracerebral hemorrhage; RCT = randomized control trial

For peer review only

## Preferred Reporting Items for Systematic reviews and Meta-Analyses extension for Scoping Reviews (PRISMA-ScR) Checklist

| SECTION                                               | ITEM | PRISMA-ScR CHECKLIST ITEM                                                                                                                                                                                                                                                                                  | REPORTED ON PAGE # |
|-------------------------------------------------------|------|------------------------------------------------------------------------------------------------------------------------------------------------------------------------------------------------------------------------------------------------------------------------------------------------------------|--------------------|
| <b>TITLE</b>                                          |      |                                                                                                                                                                                                                                                                                                            |                    |
| Title                                                 | 1    | Identify the report as a scoping review.                                                                                                                                                                                                                                                                   |                    |
| <b>ABSTRACT</b>                                       |      |                                                                                                                                                                                                                                                                                                            |                    |
| Structured summary                                    | 2    | Provide a structured summary that includes (as applicable): background, objectives, eligibility criteria, sources of evidence, charting methods, results, and conclusions that relate to the review questions and objectives.                                                                              |                    |
| <b>INTRODUCTION</b>                                   |      |                                                                                                                                                                                                                                                                                                            |                    |
| Rationale                                             | 3    | Describe the rationale for the review in the context of what is already known. Explain why the review questions/objectives lend themselves to a scoping review approach.                                                                                                                                   |                    |
| Objectives                                            | 4    | Provide an explicit statement of the questions and objectives being addressed with reference to their key elements (e.g., population or participants, concepts, and context) or other relevant key elements used to conceptualize the review questions and/or objectives.                                  |                    |
| <b>METHODS</b>                                        |      |                                                                                                                                                                                                                                                                                                            |                    |
| Protocol and registration                             | 5    | Indicate whether a review protocol exists; state if and where it can be accessed (e.g., a Web address); and if available, provide registration information, including the registration number.                                                                                                             |                    |
| Eligibility criteria                                  | 6    | Specify characteristics of the sources of evidence used as eligibility criteria (e.g., years considered, language, and publication status), and provide a rationale.                                                                                                                                       |                    |
| Information sources*                                  | 7    | Describe all information sources in the search (e.g., databases with dates of coverage and contact with authors to identify additional sources), as well as the date the most recent search was executed.                                                                                                  |                    |
| Search                                                | 8    | Present the full electronic search strategy for at least 1 database, including any limits used, such that it could be repeated.                                                                                                                                                                            |                    |
| Selection of sources of evidence†                     | 9    | State the process for selecting sources of evidence (i.e., screening and eligibility) included in the scoping review.                                                                                                                                                                                      |                    |
| Data charting process‡                                | 10   | Describe the methods of charting data from the included sources of evidence (e.g., calibrated forms or forms that have been tested by the team before their use, and whether data charting was done independently or in duplicate) and any processes for obtaining and confirming data from investigators. |                    |
| Data items                                            | 11   | List and define all variables for which data were sought and any assumptions and simplifications made.                                                                                                                                                                                                     |                    |
| Critical appraisal of individual sources of evidence§ | 12   | If done, provide a rationale for conducting a critical appraisal of included sources of evidence; describe the methods used and how this information was used in any data synthesis (if appropriate).                                                                                                      |                    |
| Synthesis of results                                  | 13   | Describe the methods of handling and summarizing the data that were charted.                                                                                                                                                                                                                               |                    |

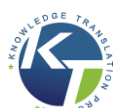

| SECTION                                       | ITEM | PRISMA-ScR CHECKLIST ITEM                                                                                                                                                                       | REPORTED ON PAGE # |
|-----------------------------------------------|------|-------------------------------------------------------------------------------------------------------------------------------------------------------------------------------------------------|--------------------|
| <b>RESULTS</b>                                |      |                                                                                                                                                                                                 |                    |
| Selection of sources of evidence              | 14   | Give numbers of sources of evidence screened, assessed for eligibility, and included in the review, with reasons for exclusions at each stage, ideally using a flow diagram.                    |                    |
| Characteristics of sources of evidence        | 15   | For each source of evidence, present characteristics for which data were charted and provide the citations.                                                                                     |                    |
| Critical appraisal within sources of evidence | 16   | If done, present data on critical appraisal of included sources of evidence (see item 12).                                                                                                      |                    |
| Results of individual sources of evidence     | 17   | For each included source of evidence, present the relevant data that were charted that relate to the review questions and objectives.                                                           |                    |
| Synthesis of results                          | 18   | Summarize and/or present the charting results as they relate to the review questions and objectives.                                                                                            |                    |
| <b>DISCUSSION</b>                             |      |                                                                                                                                                                                                 |                    |
| Summary of evidence                           | 19   | Summarize the main results (including an overview of concepts, themes, and types of evidence available), link to the review questions and objectives, and consider the relevance to key groups. |                    |
| Limitations                                   | 20   | Discuss the limitations of the scoping review process.                                                                                                                                          |                    |
| Conclusions                                   | 21   | Provide a general interpretation of the results with respect to the review questions and objectives, as well as potential implications and/or next steps.                                       |                    |
| <b>FUNDING</b>                                |      |                                                                                                                                                                                                 |                    |
| Funding                                       | 22   | Describe sources of funding for the included sources of evidence, as well as sources of funding for the scoping review. Describe the role of the funders of the scoping review.                 |                    |

JBI = Joanna Briggs Institute; PRISMA-ScR = Preferred Reporting Items for Systematic reviews and Meta-Analyses extension for Scoping Reviews.

\* Where *sources of evidence* (see second footnote) are compiled from, such as bibliographic databases, social media platforms, and Web sites.

† A more inclusive/heterogeneous term used to account for the different types of evidence or data sources (e.g., quantitative and/or qualitative research, expert opinion, and policy documents) that may be eligible in a scoping review as opposed to only studies. This is not to be confused with *information sources* (see first footnote).

‡ The frameworks by Arksey and O'Malley (6) and Levac and colleagues (7) and the JBI guidance (4, 5) refer to the process of data extraction in a scoping review as data charting.

§ The process of systematically examining research evidence to assess its validity, results, and relevance before using it to inform a decision. This term is used for items 12 and 19 instead of "risk of bias" (which is more applicable to systematic reviews of interventions) to include and acknowledge the various sources of evidence that may be used in a scoping review (e.g., quantitative and/or qualitative research, expert opinion, and policy document).

From: Tricco AC, Lillie E, Zarin W, O'Brien KK, Colquhoun H, Levac D, et al. PRISMA Extension for Scoping Reviews (PRISMA-ScR): Checklist and Explanation. *Ann Intern Med.* 2018;169:467–473. doi: [10.7326/M18-0850](https://doi.org/10.7326/M18-0850).

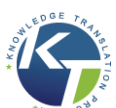

Supplement: bmjopen-2022-066742.draft_revisions.pdf [file bmjopen-2022-066742.draft_revisions.pdf]
