# Supplementary material for: Advance consent for participation in randomised controlled trials for emergency conditions: a scoping review
Source: PubMed Central journal article supplement — BMJ Open. 2023 Feb 7;13(2):e066742. doi: 10.1136/bmjopen-2022-066742 (PMC9906254; doi:10.1136/bmjopen-2022-066742), 2023-02-07
Supplement: bmjopen-2022-066742supp001.pdf [file bmjopen-2022-066742supp001.pdf]

## **SUPPLEMENTARY MATERIAL**

### **Supplementary Material Legend**

Supplementary Table 1: Search strategies

Supplementary Table 2: Data charting form

**Supplementary Table 1.** Search strategy

| Database                                                      | Search terms                                                                                          | Results    |
|---------------------------------------------------------------|-------------------------------------------------------------------------------------------------------|------------|
| <b>Embase Classic + Embase<br/>(1947 – February 10, 2020)</b> | 1. ((advance* or prior or prospective*) adj3 consent).tw.                                             | 2844       |
|                                                               | 2. (preconsent or pre-consent).tw.                                                                    | 43         |
|                                                               | 3. Advance Directives/ and Informed Consent/                                                          | 1361       |
|                                                               | 4. 1 or 2 or 3                                                                                        | 4206       |
|                                                               | 5. incapacitated.tw.                                                                                  | 1984       |
|                                                               | 6. *heart infarction/                                                                                 | 112881     |
|                                                               | 7. (cardiac arrest or heart arrest or heart attack or asystole or cardiopulmonary arrest*).tw.        | 67289      |
|                                                               | 8. (myocardial infarct* or myocardial isch*).tw.                                                      | 318778     |
|                                                               | 9. (cardiac death or heart death or arrhythmic death).tw.                                             | 41772      |
|                                                               | 10. *dementia/                                                                                        | 54639      |
|                                                               | 11. (dementia or alzheimer*).tw.                                                                      | 292062     |
|                                                               | 12. *cerebrovascular accident/                                                                        | 78550      |
|                                                               | 13. (stroke or intracerebral h?emorrhage).tw.                                                         | 385677     |
|                                                               | 14. *brain hemorrhage/                                                                                | 33439      |
|                                                               | 15. *epileptic state/                                                                                 | 10938      |
|                                                               | 16. (epilepsy or status epilepticus).tw.                                                              | 165346     |
|                                                               | 17. *subarachnoid hemorrhage/                                                                         | 21563      |
|                                                               | 18. subarachnoid h?emorrhage.tw.                                                                      | 32523      |
|                                                               | 19. exp *injury/                                                                                      | 1111912    |
|                                                               | 20. ((neurolog* or brain) adj3 (emergenc* or injur* or trauma*)).tw. (                                | 114863     |
|                                                               | 21. emergency care/                                                                                   | 44041      |
|                                                               | 22. (emergency department* or emergency treatment* or emergency setting* or emergency situation*).tw. | 149499     |
|                                                               | 23. emergency treatment/                                                                              | 17365      |
|                                                               | 24. emergenc*.ti.                                                                                     | 142870     |
|                                                               | 25. *human experiment/                                                                                | 5564       |
|                                                               | 26. *"clinical trial (topic)"/                                                                        | 10702      |
|                                                               | 27. *emergency medicine/                                                                              | 27031      |
|                                                               | 28. *emergency ward/                                                                                  | 30666      |
|                                                               | 29. *clinical research/ or *medical research/                                                         | 83362      |
|                                                               | 30. or/5-29                                                                                           | 2684505    |
|                                                               | 31. 4 and 30                                                                                          | <b>629</b> |
| <b>Ovid MEDLINE(R) ALL<br/>(1946 – February 10, 2020)</b>     | 1. ((advance* or prior or prospective*) adj3 consent).tw.                                             | 1159       |
|                                                               | 2. (preconsent or pre-consent).tw,kf.                                                                 | 25         |
|                                                               | 3. Advance Directives/ and Informed Consent/                                                          | 633        |
|                                                               | 4. or/1-3                                                                                             | 1786       |
|                                                               | 5. incapacitated.tw.                                                                                  | 1254       |
|                                                               | 6. Myocardial Infarction/                                                                             | 163865     |
|                                                               | 7. (cardiac arrest or heart arrest or heart attack or asystole or cardiopulmonary arrest*).tw.        | 41358      |
|                                                               | 8. (myocardial infarct* or myocardial isch*).tw,kw.                                                   | 218769     |
|                                                               | 9. (cardiac death or heart death or arrhythmic death).tw,kw.                                          | 23707      |
|                                                               | 10. Dementia/ or (dementia or alzheimer*).tw,kf.                                                      | 220951     |
|                                                               | 11. exp Stroke/ or (stroke or intracerebral h?emorrhage).tw,kf.                                       | 279104     |
|                                                               | 12. exp Cerebral Hemorrhage/ or Status Epilepticus/                                                   | 41146      |

|                                                                                        |                                                                                                       |            |
|----------------------------------------------------------------------------------------|-------------------------------------------------------------------------------------------------------|------------|
|                                                                                        | 13. (epilepsy or status epilepticus).tw,kw.                                                           | 109855     |
|                                                                                        | 14. exp Subarachnoid Hemorrhage/ or subarachnoid h?emorrhage.tw,kw.                                   | 29908      |
|                                                                                        | 15. exp "Wounds and Injuries"/                                                                        | 889722     |
|                                                                                        | 16. ((neurolog* or brain) adj3 (emergenc* or injur* or trauma*)).tw.                                  | 79721      |
|                                                                                        | 17. Emergency Service, Hospital/                                                                      | 66069      |
|                                                                                        | 18. Emergencies/ or Emergency Medicine/ or exp Emergency Treatment/ (                                 | 164845     |
|                                                                                        | 19. (emergency department* or emergency treatment* or emergency setting* or emergency situation*).tw. | 97671      |
|                                                                                        | 20. emergenc*.ti.                                                                                     | 109009     |
|                                                                                        | 21. exp Human Experimentation/                                                                        | 12414      |
|                                                                                        | 22. Clinical Trials as Topic/ or Biomedical Research/                                                 | 257452     |
|                                                                                        | 23. or/5-22                                                                                           | 2295131    |
|                                                                                        | 24. 4 and 23                                                                                          | <b>454</b> |
| <b>EBM Review – Cochrane Central Register of Controlled Trials (February 10, 2020)</b> | 1. ((advance* or prior or prospective*) adj3 consent).tw.                                             | 3608       |
|                                                                                        | 2. (preconsent or pre-consent).tw.                                                                    | 15         |
|                                                                                        | 3. Advance Directives/ and Informed Consent/                                                          | 1          |
|                                                                                        | 4. or/1-3                                                                                             | 3621       |
|                                                                                        | 5. incapacitated.tw.                                                                                  | 100        |
|                                                                                        | 6. Myocardial Infarction/                                                                             | 10416      |
|                                                                                        | 7. (cardiac arrest or heart arrest or heart attack or asystole or cardiopulmonary arrest*).tw. (      | 4770       |
|                                                                                        | 8. (myocardial infarct* or myocardial isch*).tw.                                                      | 30889      |
|                                                                                        | 9. (cardiac death or heart death or arrhythmic death).tw.                                             | 3461       |
|                                                                                        | 10. Dementia/ or (dementia or alzheimer*).tw.                                                         | 18563      |
|                                                                                        | 11. exp Stroke/ or (stroke or intracerebral h?emorrhage).tw.                                          | 52260      |
|                                                                                        | 12. exp Cerebral Hemorrhage/ or Status Epilepticus/                                                   | 1030       |
|                                                                                        | 13. (epilepsy or status epilepticus).tw,kw.                                                           | 6807       |
|                                                                                        | 14. exp Subarachnoid Hemorrhage/ or subarachnoid h?emorrhage.tw,kw.                                   | 1950       |
|                                                                                        | 15. exp "Wounds and Injuries"/                                                                        | 22743      |
|                                                                                        | 16. ((neurolog* or brain) adj3 (emergenc* or injur* or trauma*)).tw.                                  | 6550       |
|                                                                                        | 17. Emergency Service, Hospital/                                                                      | 2083       |
|                                                                                        | 18. Emergencies/ or Emergency Medicine/ or exp Emergency Treatment/                                   | 6536       |
|                                                                                        | 19. (emergency department* or emergency treatment* or emergency setting* or emergency situation*).tw. | 11275      |
|                                                                                        | 20. emergenc*.ti.                                                                                     | 7206       |
|                                                                                        | 21. exp Human Experimentation/                                                                        | 133        |
|                                                                                        | 22. Clinical Trials as Topic/ or Biomedical Research/                                                 | 33365      |
|                                                                                        | 23. or/5-22                                                                                           | 180502     |
|                                                                                        | 24. 4 and 23                                                                                          | 309        |
|                                                                                        | 25. (EUCTR* or IRCT* or ISRCT* or CTRI* or JPRN* or DRKS* or CHICTR* or NCT* or ACTRN*).au.           | 300851     |
|                                                                                        | 26. 24 not 25                                                                                         | <b>106</b> |
| <b>Web of Science (February 10, 2020)</b>                                              | TS=(preconsent or pre-consent)                                                                        | 33         |
|                                                                                        | TS=((advance* or prior or prospective*) NEAR/3 consent)                                               | 1870       |

|                                                                                                           |            |
|-----------------------------------------------------------------------------------------------------------|------------|
| #2 OR #1                                                                                                  | 1899       |
| TS=incapacitated                                                                                          | 3429       |
| TS=("cardiac arrest" or "heart arrest" or "heart attack" or asystole or "cardiopulmonary arrest*")        | 49571      |
| TS=("myocardial infarct*" or "myocardial isch*").                                                         | 326927     |
| TS=("cardiac death" or "heart death" or "arrhythmic death")                                               | 31798      |
| I                                                                                                         |            |
| TS=(dementia or alzheimer*)                                                                               | 319597     |
| TS=(stroke or "intracerebral h?emorrhage")                                                                | 345906     |
| TS=(epilepsy or "status epilepticus")                                                                     | 149826     |
| TS="subarachnoid h?emorrhage*"                                                                            | 3980       |
| TS=((neurolog* or brain) NEAR/3 (emergenc* or injur* or trauma*))                                         | 118137     |
| TS= ("emergency department*" or "emergency treatment*" or "emergency setting*" or "emergency situation*") | 107877     |
| TI=emergenc*                                                                                              | 153160     |
| TS=clinical research                                                                                      | 346041     |
| TS="human experiment*"                                                                                    | 2638       |
| I                                                                                                         |            |
| #16 OR #15 OR #14 OR #13 OR #12 OR #11 OR #10 OR #9 OR #8 OR #7 OR #6 OR #5 OR #4                         | 1747826    |
| #17 AND #3                                                                                                | <b>343</b> |

**Supplementary Table 2.** Data charting form

| SECTION                                        | DATA ITEM                                    | EXTRACTED DATA                                                                                                                                                      |
|------------------------------------------------|----------------------------------------------|---------------------------------------------------------------------------------------------------------------------------------------------------------------------|
| <b>Study identification</b>                    |                                              |                                                                                                                                                                     |
|                                                | Paper number                                 |                                                                                                                                                                     |
|                                                | Journal - Title                              |                                                                                                                                                                     |
|                                                | Article - Title                              |                                                                                                                                                                     |
|                                                | Author last name                             |                                                                                                                                                                     |
|                                                | Type of author (MD/PhD/Other)                | MD<br>PhD<br>Other                                                                                                                                                  |
|                                                | Publication date (Year)                      |                                                                                                                                                                     |
|                                                | Country of Origin                            | Canada<br>United States<br>United Kingdom<br>Other country in North or South America<br>Other country in Europe<br>Other country in Asia<br>Other country in Africa |
| <b>Study characteristics &amp; methodology</b> |                                              |                                                                                                                                                                     |
| <i>Medical condition</i>                       | What is the condition?                       | Ischemic Stroke<br>ICH<br>Seizure<br>Cardiac<br>Respiratory<br>Psychiatric<br>None [no mentioned condition]<br>Other                                                |
|                                                | Is the condition neurological?               | Yes<br>No                                                                                                                                                           |
| <i>Paper characteristics</i>                   | Type of research paper                       | RCT<br>Cohort<br>Case-Control<br>Survey<br>Interview<br>Commentary<br>Philosophical argument<br>Historical review<br>Other                                          |
|                                                | If clinical study, was Advance consent used? | Yes<br>No<br>Not applicable                                                                                                                                         |
| <b>Results</b>                                 |                                              |                                                                                                                                                                     |
|                                                | Author disposition                           | In favour of advance consent<br>Against advance consent                                                                                                             |

|  |                     |                                                                  |
|--|---------------------|------------------------------------------------------------------|
|  |                     | No opinion mentioned                                             |
|  | Specific statements | Extract any paragraph of text where advance consent is discussed |

ICH = intracerebral hemorrhage; RCT = randomized control trial
